# Supplementary material for: AIBN for Ru-catalyzed meta-CAr–H alkylation
Source: Royal Society of Chemistry journal article supplement (doi:10.1039/d0qo00703j), 2020-01-01

## **AIBN for Ru-catalyzed *meta*-C<sub>Ar</sub>-H alkylation**

Suling Yang<sup>a</sup>, Bingxu Yan<sup>a</sup>, Lei Zhong<sup>a</sup>, Chunqi Jia<sup>b</sup>, Dan Yao<sup>a</sup>, Chunli Yang<sup>a</sup>, Kai Sun<sup>a</sup> and Gang Li<sup>a\*</sup>

<sup>a</sup>College of Chemistry and Chemical Engineering, Henan Province Key Laboratory of New Optoelectronic Functional Materials, Anyang Normal University, Anyang 455002, PR China.

<sup>b</sup>Engineering Research Center of Molecular Medicine of Ministry of Education, Key Laboratory of Fujian Molecular Medicine, Key Laboratory of Xiamen Marine and Gene Drugs, School of Biomedical Sciences, Huaqiao University, Xiamen 361021, PR China

### **Supporting Information**

|                                                                                                                         |     |
|-------------------------------------------------------------------------------------------------------------------------|-----|
| 1. General information.....                                                                                             | S-1 |
| 2. Experimental section.....                                                                                            | S-2 |
| 2.1. Synthesis of arenes substrates .....                                                                               | S-2 |
| 2.2. Typical experimental procedure of ruthenium-catalyzed <i>meta</i> -C-H<br>bond alkylation of arenes with AIBN..... | S-2 |
| 2.3. Typical procedure of intermolecular competition experiments.....                                                   | S-2 |
| 3. References.....                                                                                                      | S-3 |
| 4. Data and spectra of <sup>1</sup> H NMR and <sup>13</sup> C NMR.....                                                  | S-3 |

## 1. General Information

All commercial reagents and solvents were used directly without additional purification. Column chromatography were performed on silica gel 200-300 mesh.  $^1\text{H}$  NMR and  $^{13}\text{C}$  NMR spectra were registered on a Bruker Ascend<sup>TM</sup> 400 spectrometer (Germany). Chemical shifts were reported in units (ppm) referenced to 0.0 ppm of TMS in the  $^1\text{H}$  spectrum and 77.0 ppm of  $\text{CDCl}_3$  in the  $^{13}\text{C}$  spectrum. All coupling constants were reported in Hertz (Hz). HRMS data were obtained on a Waters LCT Premierxe<sup>TM</sup> (USA), Single-crystal X-ray crystallography was carried out on a Bruker Smart Apex II diffractometer system.

## 2. Experimental Section

### 2.1. Synthesis of arenes substrates

The pyridine derivatives were prepared via Suzuki coupling of the corresponding arylboronic acids and 2-bromopyridine according to literature report.<sup>1</sup>

The pyrimidine derivatives were prepared via Suzuki coupling of the corresponding arylboronic acids and 2-bromopyrimidine according to literature report.<sup>2</sup>

### 2.2. Typical experimental procedure of Ru(III)-catalyzed *meta*-C-H bond alkylation of arenes with AIBN

2-Phenylpyridine (0.2 mmol), AIBN (0.6 mmol, 3.0 equiv.),  $\text{RuCl}_3$  (0.02 mmol, 10 mol %), dry DMF (0.5 mL) were charged into a pre-dried 30-mL pressure tube sealed with rubber plugs under  $\text{N}_2$  atmosphere. The reaction mixture was stirred at 120 °C for 12 h. The reaction was cooled down to room temperature, and saturated salt water (10 mL) was added. The resulting mixture was extracted with EtOAc (5 mL $\times$ 5). The combined organic layer was dried over anhydrous  $\text{Na}_2\text{SO}_4$ , filtered, and the solvent was removed under reduced pressure to provide the crude product. The purification was performed by flash column chromatography (PE/EtOAc as eluent) on silica gel.

### 2.3. Typical experimental procedure of intermolecular competition experiments

2-(4-Methoxyphenyl)pyridine (0.2 mmol), 2-(4-fluorophenyl)pyridine (0.2 mmol), AIBN (0.2 mmol),  $\text{RuCl}_3$  (0.02 mmol, 10 mol %), dry DMF (0.5 mL) were charged into a pre-dried 30-mL pressure tube sealed with rubber plugs under  $\text{N}_2$  atmosphere. The reaction mixture was stirred at 120 °C for 12 h. The reaction was cooled down to

room temperature, and saturated salt water (10 mL) was added. The resulting mixture was extracted with EtOAc (5 mL×5). The combined organic layer was dried over anhydrous Na<sub>2</sub>SO<sub>4</sub>, filtered, and the solvent was removed under reduced pressure to provide the crude product. The purification was performed by flash column chromatography (PE/EtOAc as eluent) on silica gel.

2-Phenylpyridine (0.2 mmol), AIBN (0.2 mmol, 1.0 equiv.), 2,2'-azobis-(2,4-dimethylvaleronitrile) (0.2 mmol, 1.0 equiv.), RuCl<sub>3</sub> (0.02 mmol, 10 mol %), dry DMF (0.5 mL) were charged into a pre-dried 30-mL pressure tube sealed with rubber plugs under N<sub>2</sub> atmosphere. The reaction mixture was stirred at 120 °C for 12 h. The reaction was cooled down to room temperature, and saturated salt water (10 mL) was added. The resulting mixture was extracted with EtOAc (5 mL×5). The combined organic layer was dried over anhydrous Na<sub>2</sub>SO<sub>4</sub>, filtered, and the solvent was removed under reduced pressure to provide the crude product. The purification was performed by flash column chromatography (PE/EtOAc as eluent) on silica gel.

### 3. References

1. C. Liu, N. Han, X. X. X. Song, J. S. Qiu, Eur. J. Org. Chem. 2010, 29, 5548–5551.
2. M. A. Ali, X. Y. Yao, G. G. Li, H. J. Lu, Org. Lett. 2016, 186, 1386-1389

### 4. Data and Spectra of <sup>1</sup>H NMR and <sup>13</sup>C NMR

**2-methyl-2-(3-(pyridin-2-yl)phenyl)propanenitrile (3a**, colorless oil, PE/EtOAc = 3:1 as eluent, 32.3 mg, 73% yield): <sup>1</sup>H NMR (400 MHz, CDCl<sub>3</sub>) δ 8.71 (d, *J* = 4.8 Hz, 1H), 8.13 (t, *J* = 1.6 Hz, 1H), 7.91 (d, *J* = 7.6 Hz, 1H), 7.81–7.67 (m, 2H), 7.59–7.45 (m, 2H), 7.28–7.24 (m, 1H), 1.79 (s, 6H). <sup>13</sup>C NMR (101 MHz, CDCl<sub>3</sub>) δ 156.78, 149.74, 142.03, 140.18, 136.91, 129.35, 126.38, 125.77, 124.55, 123.65, 122.49, 120.78, 37.34, 29.18. HRMS (ESI) Calcd. For C<sub>15</sub>H<sub>15</sub>N<sub>2</sub>: [M+H]<sup>+</sup>, 223.1230, Found: *m/z* 223.1234.

**2-methyl-2-(2-methyl-5-(pyridin-2-yl)phenyl)propanenitrile (3b**, colorless oil, PE/EtOAc = 3:1 as eluent, 26.9 mg, 57% yield): <sup>1</sup>H NMR (400 MHz, CDCl<sub>3</sub>) δ 8.70 (d, *J* = 4.7 Hz, 1H), 8.04 (s, 1H), 7.78 (m, 2H), 7.71 (d, *J* = 7.8 Hz, 1H), 7.34 (d, *J* = 7.9 Hz, 1H), 7.27–7.22 (m, 1H), 2.72 (s, 3H), 1.89 (s, 6H). <sup>13</sup>C NMR (101 MHz, CDCl<sub>3</sub>) δ 156.94, 149.69, 138.56, 137.66, 137.24, 136.83, 133.15, 126.20, 124.52, 123.56, 122.18, 120.42, 35.10, 28.24, 20.98. HRMS (ESI) Calcd. For C<sub>16</sub>H<sub>17</sub>N<sub>2</sub>:

[M+H]<sup>+</sup>, 237.1386, Found: m/z 237.1388.

**2-methyl-2-(4-(pyridin-2-yl)-[1,1'-biphenyl]-2-yl)propanenitrile (3c**, colorless oil, PE/EtOAc = 3:1 as eluent, 31 mg, 52% yield): <sup>1</sup>H NMR (400 MHz, CDCl<sub>3</sub>) δ 8.75 (d, *J* = 4.2 Hz, 1H), 8.29 (s, 1H), 7.91 (d, *J* = 7.9 Hz, 1H), 7.82 (d, *J* = 6.4 Hz, 2H), 7.48–7.36 (m, 6H), 7.32 (d, *J* = 6.3 Hz, 1H), 1.71 (s, 6H). <sup>13</sup>C NMR (101 MHz, CDCl<sub>3</sub>) δ 156.67, 149.76, 141.18, 138.33, 137.07, 133.38, 130.04, 128.71, 127.83 (d), 126.67, 125.64, 125.18, 122.56, 120.84, 115.75, 37.22, 29.98. HRMS (ESI) Calcd. For C<sub>21</sub>H<sub>19</sub>N<sub>2</sub>: [M+H]<sup>+</sup>, 299.1543, Found: m/z 299.1544.

**2-(2-chloro-5-(pyridin-2-yl)phenyl)-2-methylpropanenitrile (3d**, colorless oil, PE/EtOAc = 3:1 as eluent, 23.6 mg, 46% yield): <sup>1</sup>H NMR (400 MHz, CDCl<sub>3</sub>) δ 8.71 (d, *J* = 4.1 Hz, 1H), 8.21 (d, *J* = 2.1 Hz, 1H), 7.87 (m, 1H), 7.79 (m, 1H), 7.73 (d, *J* = 7.9 Hz, 1H), 7.55 (d, *J* = 8.3 Hz, 1H), 7.32–7.28 (m, 1H), 1.96 (s, 6H). <sup>13</sup>C NMR (101 MHz, CDCl<sub>3</sub>) δ 155.71, 149.86, 138.45, 137.41, 136.93, 134.02, 132.18, 127.47, 125.77, 123.22, 122.65, 120.40, 36.73, 27.27. HRMS (ESI) Calcd. For C<sub>15</sub>H<sub>14</sub>ClN<sub>2</sub>: [M+H]<sup>+</sup>, 257.0840, Found: m/z 257.0843.

**2-(2-bromo-5-(pyridin-2-yl)phenyl)-2-methylpropanenitrile (3e**, colorless oil, PE/EtOAc = 3:1 as eluent, 28.2 mg, 47% yield): <sup>1</sup>H NMR (400 MHz, CDCl<sub>3</sub>) δ 8.70 (d, *J* = 4.8 Hz, 1H), 8.20 (s, 1H), 7.86–7.68 (m, 4H), 7.37–7.28 (m, 1H), 1.98 (s, 6H). <sup>13</sup>C NMR (101 MHz, CDCl<sub>3</sub>) δ 155.72, 149.87, 139.16, 138.67, 137.04, 135.91, 127.64, 125.93, 123.38 (d), 122.78, 120.47, 37.47, 27.56. HRMS (ESI) Calcd. For C<sub>15</sub>H<sub>14</sub>BrN<sub>2</sub>: [M+H]<sup>+</sup>, 301.0335, Found: m/z 301.0330.

**2-(2-fluoro-5-(pyridin-2-yl)phenyl)-2-methylpropanenitrile (3f**, colorless oil, PE/EtOAc = 3:1 as eluent, 20.6 mg, 43% yield): <sup>1</sup>H NMR (400 MHz, CDCl<sub>3</sub>) δ 8.70 (d, *J* = 4.8 Hz, 1H), 8.16 (m, 1H), 7.95 (m, 1H), 7.78 (m, 1H), 7.72 (d, *J* = 7.8 Hz, 1H), 7.28–7.18 (m, 2H), 1.88 (s, 6H). <sup>13</sup>C NMR (101 MHz, CDCl<sub>3</sub>) δ 162.18, 160.15, 155.92, 149.77, 136.93, 136.13, 128.43 (d), 125.96 (d), 123.51, 122.37, 120.38, 117.24, 117.01, 35.14, 27.22(d). HRMS (ESI) Calcd. For C<sub>15</sub>H<sub>14</sub>FN<sub>2</sub>: [M+H]<sup>+</sup>, 241.1136, Found: m/z 241.1132.

**2-(2-methoxy-5-(pyridin-2-yl)phenyl)-2-methylpropanenitrile (3g**, colorless oil, PE/EtOAc = 3:1 as eluent, 34.3 mg, 68% yield): <sup>1</sup>H NMR (400 MHz, CDCl<sub>3</sub>) δ 8.70–8.61 (m, 1H), 8.05 (d, *J* = 2.2 Hz, 1H), 7.92 (m, 1H), 7.71 (m, 2H), 7.19 (m, 1H), 7.04 (d, *J* = 8.6 Hz, 1H), 3.98 (s, 3H), 1.84 (s, 6H). <sup>13</sup>C NMR (101 MHz, CDCl<sub>3</sub>) δ 158.09,

156.74, 149.61, 136.78, 132.10, 129.02, 127.82, 124.74(d), 121.71, 119.97, 112.08, 55.73, 34.46, 27.03. HRMS (ESI) Calcd. For  $C_{16}H_{17}N_2O$ :  $[M+H]^+$ , 253.1335, Found:  $m/z$  253.1331.

**2-methyl-2-(3-(4-methylpyridin-2-yl)phenyl)propanenitrile (3h)**, colorless oil, PE/EtOAc = 3:1 as eluent, 30.2 mg, 64% yield):  $^1H$  NMR (400 MHz,  $CDCl_3$ )  $\delta$  8.56 (d,  $J = 5.0$  Hz, 1H), 8.10 (t,  $J = 1.6$  Hz, 1H), 7.90 (m, 1H), 7.65–7.43 (m, 3H), 7.10 (d,  $J = 4.9$  Hz, 1H), 2.44 (s, 3H), 1.81 (s, 6H).  $^{13}C$  NMR (101 MHz,  $CDCl_3$ )  $\delta$  156.73, 149.51, 147.99, 141.92, 140.35, 129.30, 126.44, 125.63, 124.62, 123.59 (d), 121.76, 37.35, 29.21, 21.27. HRMS (ESI) Calcd. For  $C_{16}H_{17}N_2$ :  $[M+H]^+$ , 237.1386, Found:  $m/z$  237.1383.

**2-methyl-2-(3-(5-methylpyridin-2-yl)phenyl)propanenitrile (3i)**, colorless oil, PE/EtOAc = 3:1 as eluent, 33.5 mg, 71% yield):  $^1H$  NMR (400 MHz,  $CDCl_3$ )  $\delta$  8.53 (s, 1H), 8.10 (d,  $J = 1.6$  Hz, 1H), 7.88 (m, 1H), 7.65 (d,  $J = 8.0$  Hz, 1H), 7.58 (m, 1H), 7.51 (m, 2H), 2.38 (s, 3H), 1.80 (s, 6H).  $^{13}C$  NMR (101 MHz,  $CDCl_3$ )  $\delta$  154.12, 150.17, 141.94, 140.20, 137.44, 132.08, 129.31, 126.16, 125.42, 124.62, 123.39, 120.27, 37.35, 29.20, 18.22. HRMS (ESI) Calcd. For  $C_{16}H_{17}N_2$ :  $[M+H]^+$ , 237.1386, Found:  $m/z$  237.1384.

**2-(3-(1H-pyrazol-1-yl)phenyl)-2-methylpropanenitrile (3j)**, colorless oil, PE/EtOAc = 3:1 as eluent, 19.4 mg, 46% yield):  $^1H$  NMR (400 MHz,  $CDCl_3$ )  $\delta$  7.97 (d,  $J = 2.4$  Hz, 1H), 7.86 (s, 1H), 7.76 (d,  $J = 1.3$  Hz, 1H), 7.62 (d,  $J = 7.8$  Hz, 1H), 7.48 (m, 2H), 6.51 (t,  $J = 2.0$  Hz, 1H), 1.80 (s, 6H).  $^{13}C$  NMR (101 MHz,  $CDCl_3$ )  $\delta$  143.17, 141.40, 140.78, 130.07, 126.93, 124.25, 123.31, 118.43, 116.16, 107.98, 37.30, 29.10. HRMS (ESI) Calcd. For  $C_{13}H_{14}N_3$ :  $[M+H]^+$ , 212.1182, Found:  $m/z$  212.1185.

**2-methyl-2-(3-(pyrimidin-2-yl)phenyl)propanenitrile (3k)**, colorless oil, PE/EtOAc = 3:1 as eluent, 30.3 mg, 68% yield):  $^1H$  NMR (400 MHz,  $CDCl_3$ )  $\delta$  8.83 (d,  $J = 4.8$  Hz, 2H), 8.58 (s, 1H), 8.41 (d,  $J = 7.8$  Hz, 1H), 7.66 (m, 1H), 7.54 (t,  $J = 7.8$  Hz, 1H), 7.23 (t,  $J = 4.8$  Hz, 1H), 1.82 (s, 6H).  $^{13}C$  NMR (101 MHz,  $CDCl_3$ )  $\delta$  164.10, 157.31, 141.92, 138.33, 129.27, 127.69 (d), 124.58 (d), 119.43, 37.30, 29.19. HRMS (ESI) Calcd. For  $C_{14}H_{14}N_3$ :  $[M+H]^+$ , 224.1182, Found:  $m/z$  224.1187.

**2-methyl-2-(2-methyl-5-(pyrimidin-2-yl)phenyl)propanenitrile (3l)**, colorless oil, PE/EtOAc = 3:1 as eluent, 26.1 mg, 55% yield):  $^1H$  NMR (400 MHz,  $CDCl_3$ )  $\delta$  8.81 (d,  $J = 4.8$  Hz, 2H), 8.46 (d,  $J = 1.4$  Hz, 1H), 8.31 (m, 1H), 7.37 (d,  $J = 8.0$  Hz, 1H),

7.21 (t,  $J = 4.8$  Hz, 1H), 2.74 (s, 3H), 1.90 (s, 6H).  $^{13}\text{C}$  NMR (101 MHz,  $\text{CDCl}_3$ )  $\delta$  164.53, 157.24, 139.36, 138.42, 135.86, 133.13, 127.61, 124.54 (d), 119.10, 34.98, 28.31, 21.15. HRMS (ESI) Calcd. For  $\text{C}_{15}\text{H}_{16}\text{N}_3$ :  $[\text{M}+\text{H}]^+$ , 238.1339, Found:  $m/z$  238.1336.

**2-methyl-2-(3-(pyrimidin-2-yl)naphthalen-1-yl)propanenitrile (3m)**, white solid, PE/EtOAc = 3:1 as eluent, 30.6 mg, 56% yield):  $^1\text{H}$  NMR (400 MHz,  $\text{CDCl}_3$ )  $\delta$  9.00 (s, 1H), 8.88 (d,  $J = 4.8$  Hz, 2H), 8.62 (m, 2H), 8.09 (d,  $J = 8.0$  Hz, 1H), 7.71 (t,  $J = 7.3$  Hz, 1H), 7.60 (t,  $J = 7.5$  Hz, 1H), 7.26 (t,  $J = 5.4$  Hz, 1H), 2.09 (s, 6H).  $^{13}\text{C}$  NMR (101 MHz,  $\text{CDCl}_3$ )  $\delta$  164.17, 157.37, 136.26, 134.65, 133.89, 131.40, 130.94, 129.91, 127.70, 126.27, 125.07, 124.57, 122.07, 119.38, 34.70, 28.91. HRMS (ESI) Calcd. For  $\text{C}_{18}\text{H}_{16}\text{N}_3$ :  $[\text{M}+\text{H}]^+$ , 274.1339, Found:  $m/z$  274.1332.

**2-methyl-2-(3-(pyridin-2-yl)naphthalen-1-yl)propanenitrile (3n)**, colorless oil, PE/EtOAc = 3:1 as eluent, 28.3 mg, 52% yield):  $^1\text{H}$  NMR (400 MHz,  $\text{CDCl}_3$ )  $\delta$  8.77 (d,  $J = 4.7$  Hz, 1H), 8.59 (d,  $J = 8.6$  Hz, 1H), 8.41 (s, 1H), 8.29 (d,  $J = 1.4$  Hz, 1H), 8.03 (d,  $J = 8.1$  Hz, 1H), 7.90 (d,  $J = 7.9$  Hz, 1H), 7.82 (m, 1H), 7.67 (m, 1H), 7.58 (t,  $J = 7.5$  Hz, 1H), 7.36–7.26 (m, 1H), 2.08 (s, 6H).  $^{13}\text{C}$  NMR (101 MHz,  $\text{CDCl}_3$ )  $\delta$  156.80, 149.82, 136.94, 136.46, 135.83, 134.80, 130.30, 127.57, 127.00, 126.25, 125.03, 124.56, 122.44, 121.94, 120.83, 34.81, 28.86. HRMS (ESI) Calcd. For  $\text{C}_{19}\text{H}_{17}\text{N}_2$ :  $[\text{M}+\text{H}]^+$ , 273.1386, Found:  $m/z$  273.1381.

**2-(benzo[h]quinolin-7-yl)-2-methylpropanenitrile (3o)**, colorless oil, PE/EtOAc = 3:1 as eluent, 31 mg, 63% yield):  $^1\text{H}$  NMR (400 MHz,  $\text{CDCl}_3$ )  $\delta$  9.54–9.43 (m, 1H), 9.04 (m, 1H), 8.60 (d,  $J = 9.4$  Hz, 1H), 8.24 (m, 1H), 7.87 (d,  $J = 9.4$  Hz, 1H), 7.79–7.70 (m, 2H), 7.58 (m, 1H), 2.04 (s, 6H).  $^{13}\text{C}$  NMR (101 MHz,  $\text{CDCl}_3$ )  $\delta$  149.20, 146.73, 135.79 (d), 133.12, 130.59, 126.36, 125.77, 125.51 (d), 125.11, 124.78, 123.60, 122.30, 34.65, 29.15. HRMS (ESI) Calcd. For  $\text{C}_{17}\text{H}_{15}\text{N}_2$ :  $[\text{M}+\text{H}]^+$ , 247.1230, Found:  $m/z$  247.1233.

**2-methyl-2-(3-(pyridin-2-yl)phenyl)butanenitrile (3p)**, colorless oil, PE/EtOAc = 3:1 as eluent, 31.2 mg, 66% yield):  $^1\text{H}$  NMR (400 MHz,  $\text{CDCl}_3$ )  $\delta$  8.71 (m, 1H), 8.14–8.06 (m, 1H), 7.98–7.88 (m, 1H), 7.81–7.72 (m, 2H), 7.56–7.45 (m, 2H), 7.31–7.21 (m, 1H), 2.04 (q,  $J = 7.4$  Hz, 2H), 1.78 (s, 3H), 1.00 (t,  $J = 7.4$  Hz, 3H).  $^{13}\text{C}$  NMR (101 MHz,  $\text{CDCl}_3$ )  $\delta$  156.82, 149.76, 140.73, 140.14, 136.87, 129.26, 126.26 (d), 124.05, 123.39, 122.46, 120.75, 43.40, 35.27, 27.31, 9.95. HRMS (ESI) Calcd.

For C<sub>16</sub>H<sub>17</sub>N<sub>2</sub>: [M+H]<sup>+</sup>, 237.1386, Found: m/z 237.1382.

**2,4-dimethyl-2-(3-(pyridin-2-yl)phenyl)pentanenitrile (3q)**, colorless oil, PE/EtOAc = 3:1 as eluent, 32.8 mg, 62% yield): <sup>1</sup>H NMR (400 MHz, CDCl<sub>3</sub>) δ 8.72 (d, *J* = 4.8 Hz, 1H), 8.11 (s, 1H), 7.93 (d, *J* = 7.3 Hz, 1H), 7.78 (m, 2H), 7.61–7.46 (m, 2H), 7.30–7.25 (m, 1H), 1.95 (m, 2H), 1.79 (d, *J* = 8.4 Hz, 3H), 1.76–1.68 (m, 1H), 1.02 (d, *J* = 6.6 Hz, 3H), 0.80 (d, *J* = 6.7 Hz, 3H). <sup>13</sup>C NMR (101 MHz, CDCl<sub>3</sub>) δ 156.85, 149.78, 141.16, 140.10, 136.86, 129.25, 126.19 (d), 123.98 (d), 122.44, 120.74, 50.36, 41.80, 29.32, 25.91, 23.77, 23.48. HRMS (ESI) Calcd. For C<sub>18</sub>H<sub>21</sub>N<sub>2</sub>: [M+H]<sup>+</sup>, 265.1699, Found: m/z 265.1692.

**1-(3-(pyridin-2-yl)phenyl)cyclohexanecarbonitrile (3r)**, colorless oil, PE/EtOAc = 3:1 as eluent, 29.3 mg, 56% yield): <sup>1</sup>H NMR (400 MHz, CDCl<sub>3</sub>) δ 8.71 (d, *J* = 4.5 Hz, 1H), 8.15 (d, *J* = 1.6 Hz, 1H), 7.91 (d, *J* = 7.6 Hz, 1H), 7.82–7.71 (m, 2H), 7.58 (d, *J* = 7.8 Hz, 1H), 7.50 (t, *J* = 7.7 Hz, 1H), 7.26 (m, 1H), 1.93–1.84 (m, 8H), 1.32 (d, *J* = 8.6 Hz, 2H). <sup>13</sup>C NMR (101 MHz, CDCl<sub>3</sub>) δ 156.91, 149.74, 142.07, 140.10, 136.88, 129.30, 126.35 (d), 124.15, 122.73, 122.43, 120.77, 44.52, 37.36, 24.96, 23.62. HRMS (ESI) Calcd. For C<sub>18</sub>H<sub>19</sub>N<sub>2</sub>: [M+H]<sup>+</sup>, 263.1543, Found: m/z 263.1541.

**methyl 2-methyl-2-(3-(pyridin-2-yl)phenyl)propanoate (3s)**, white solid, PE/EtOAc = 3:1 as eluent, 33.2 mg, 65% yield): <sup>1</sup>H NMR (400 MHz, CDCl<sub>3</sub>) δ 8.78–8.65 (m, 1H), 8.00 (d, *J* = 1.5 Hz, 1H), 7.90–7.82 (m, 1H), 7.74 (m, 2H), 7.41 (m, 2H), 7.23 (m, 1H), 3.67 (s, 3H), 1.66 (s, 6H). <sup>13</sup>C NMR (101 MHz, CDCl<sub>3</sub>) δ 177.25, 157.49, 149.66, 145.18, 139.60, 136.73, 128.79, 126.46, 125.41, 124.24, 122.15, 120.76, 52.25, 46.66, 26.60. HRMS (ESI) Calcd. For C<sub>16</sub>H<sub>18</sub>NO<sub>2</sub>: [M+H]<sup>+</sup>, 256.1332, Found: m/z 256.1328.

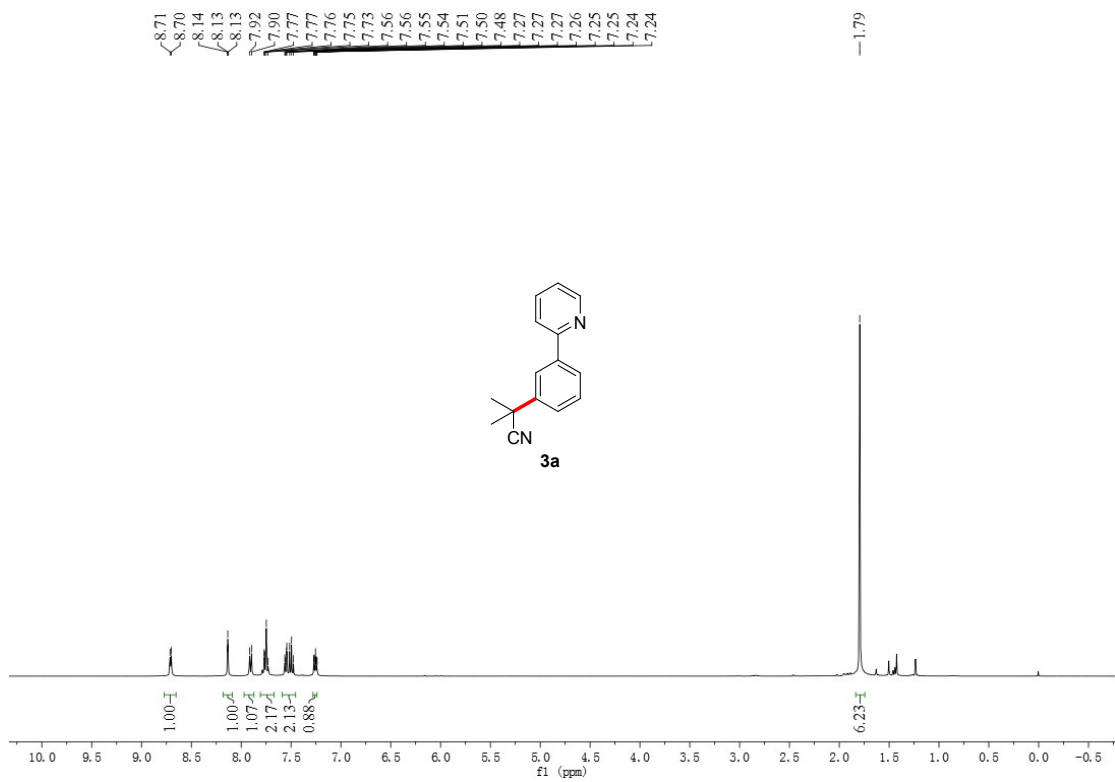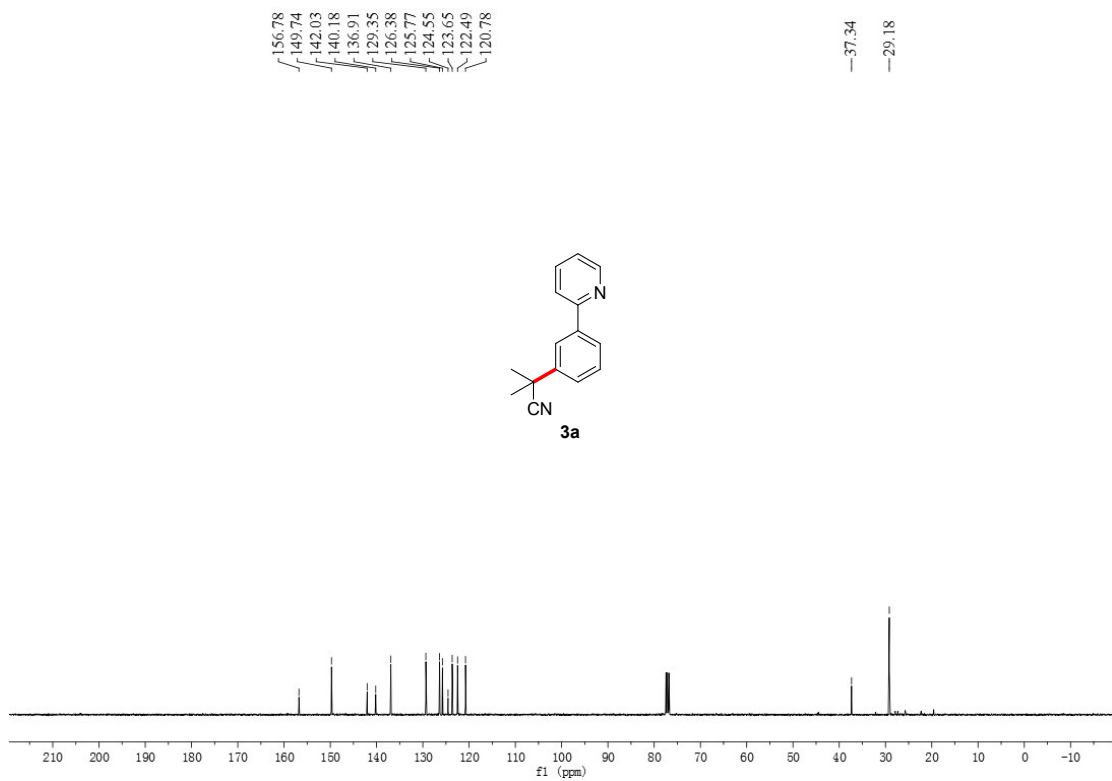



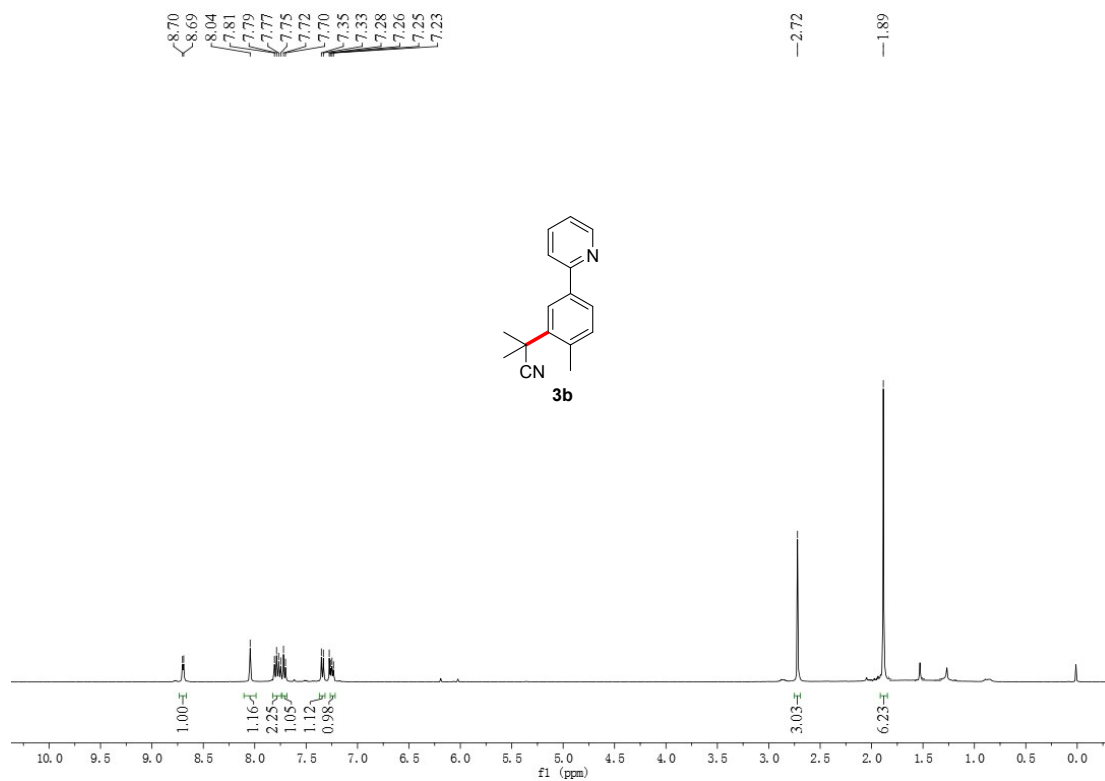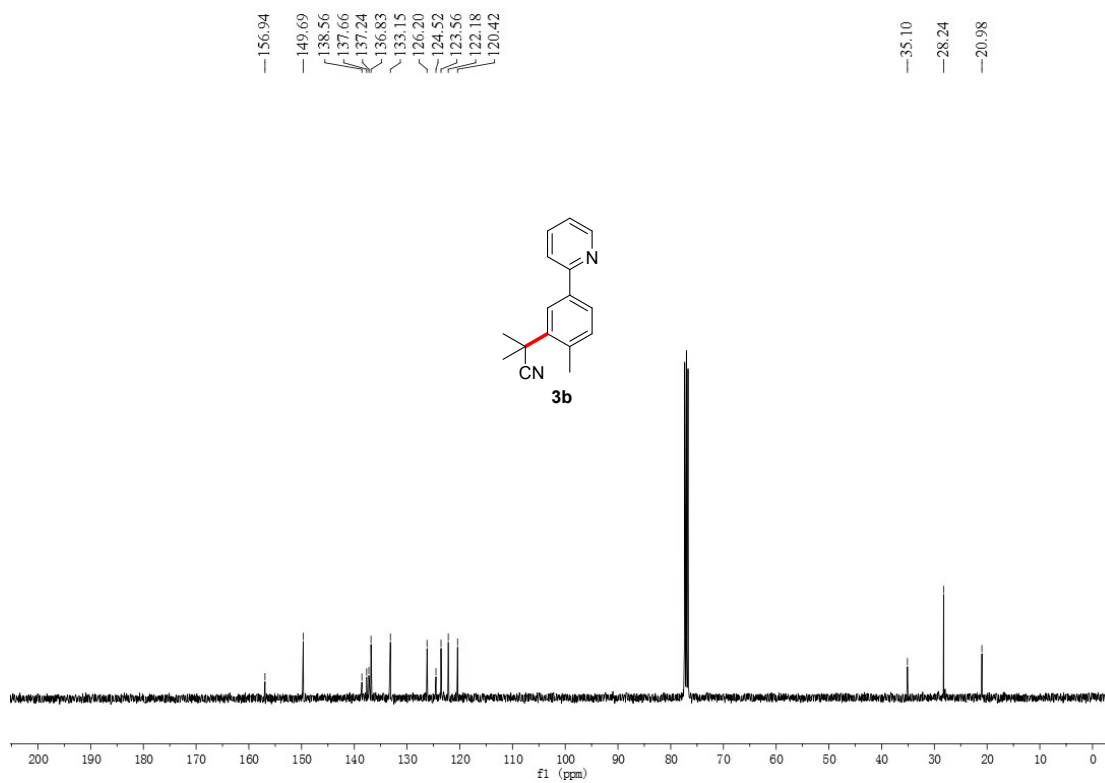

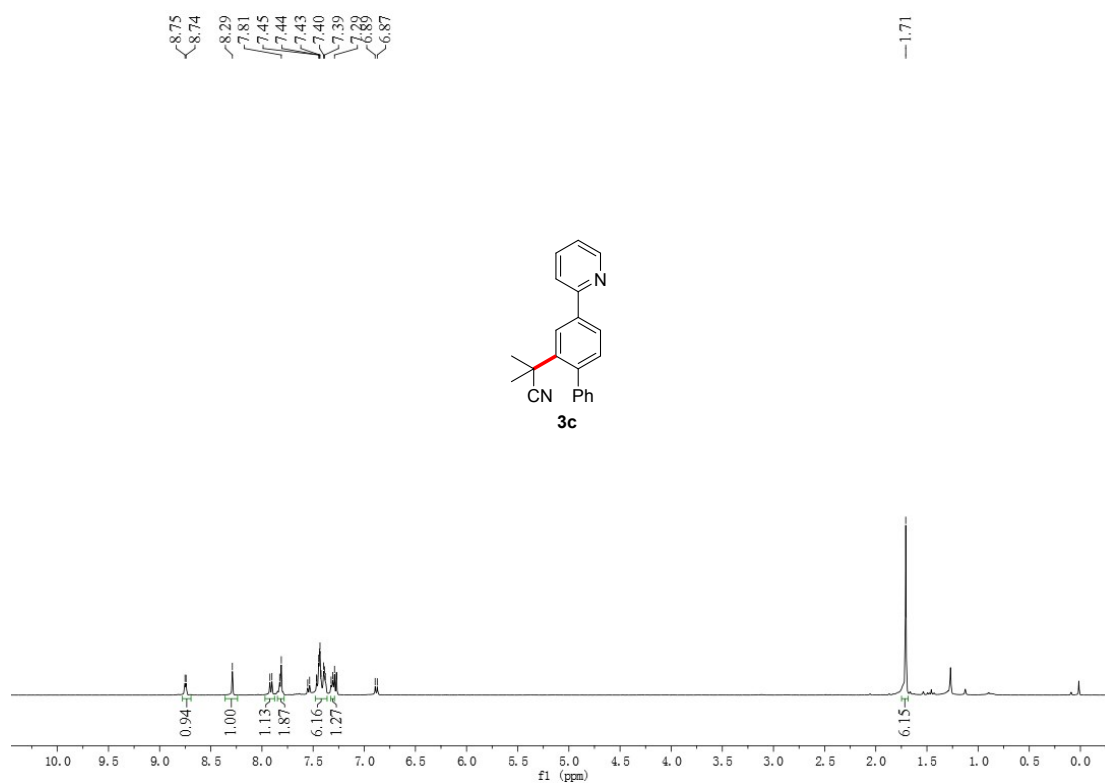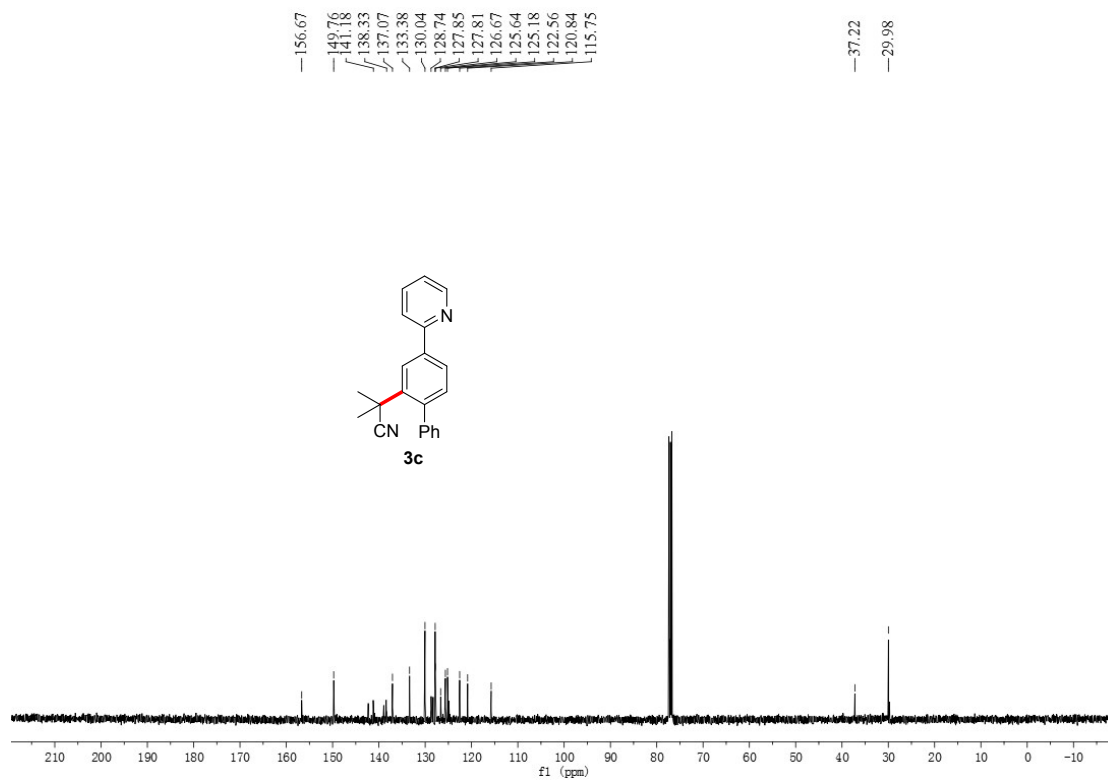

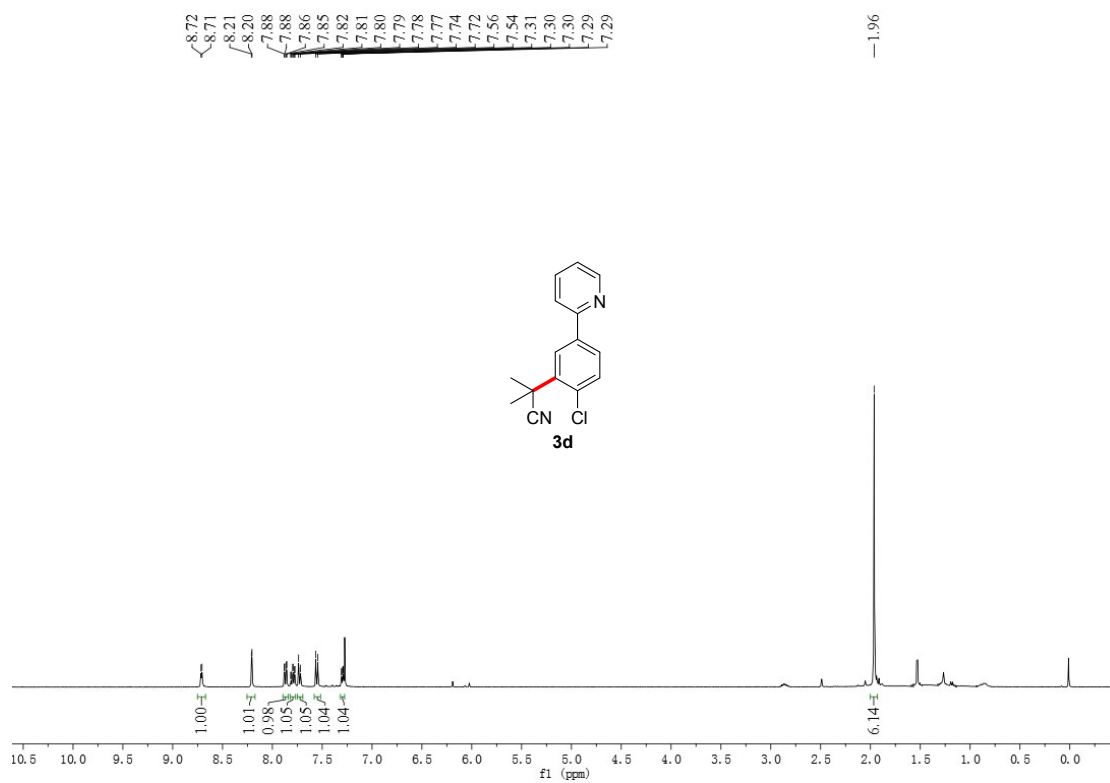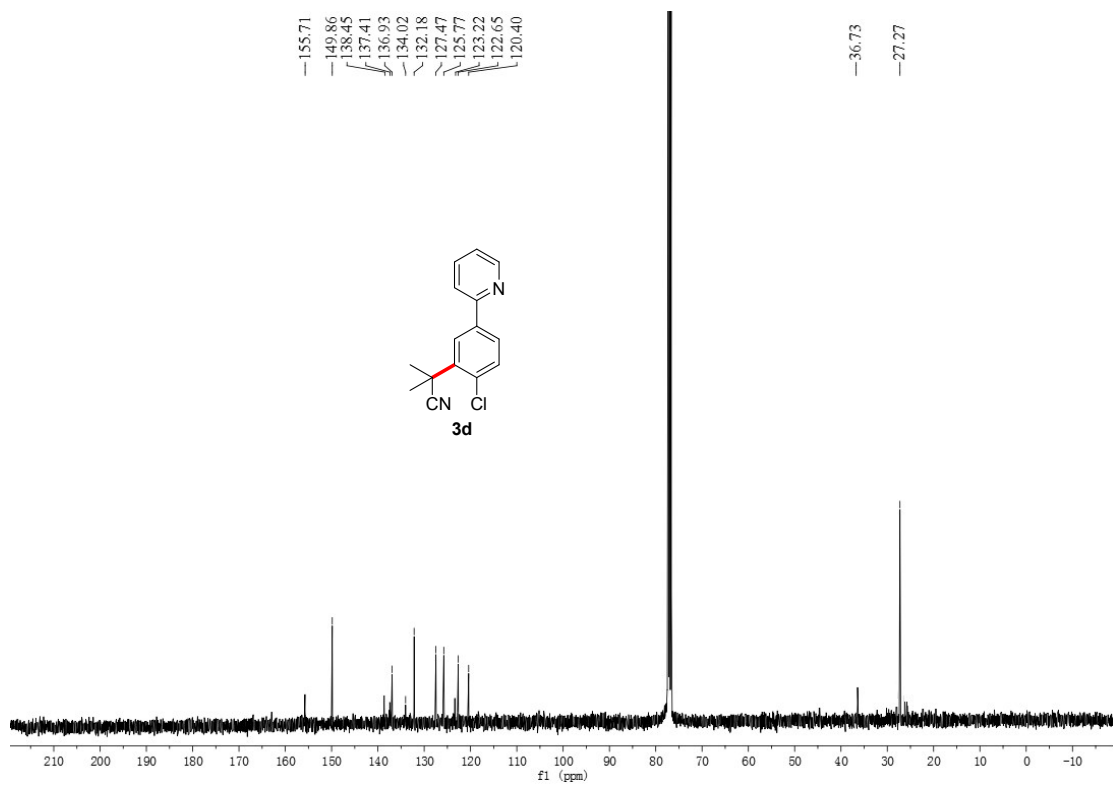

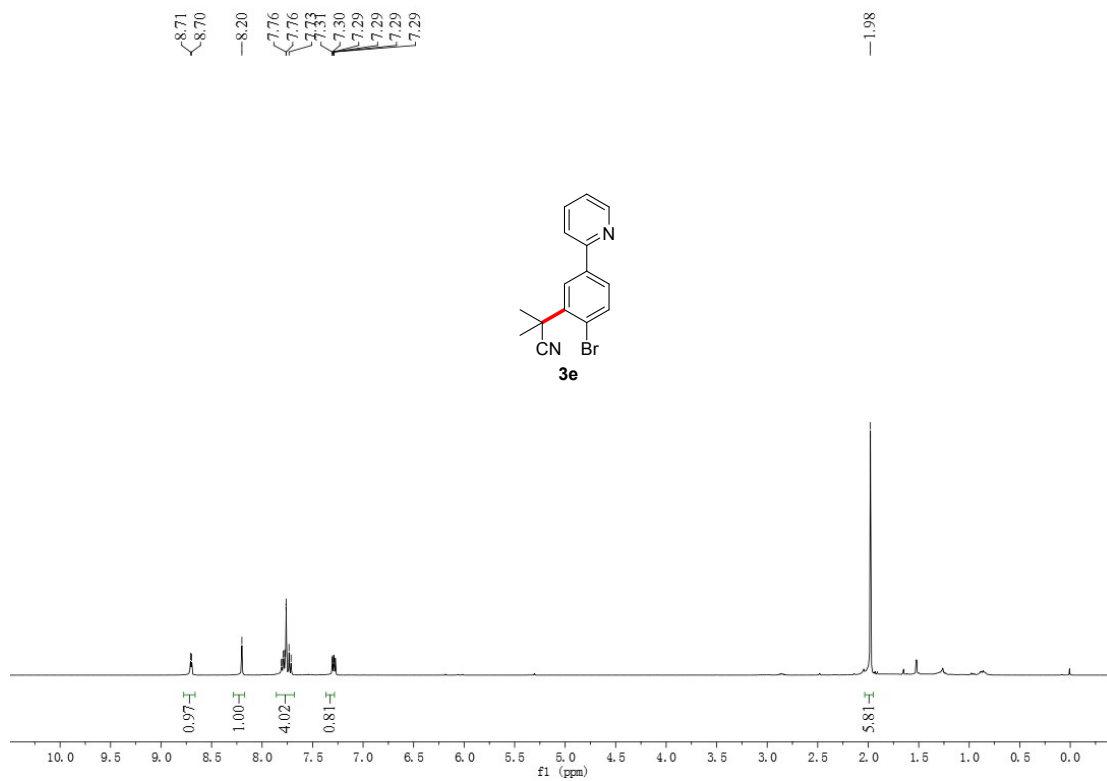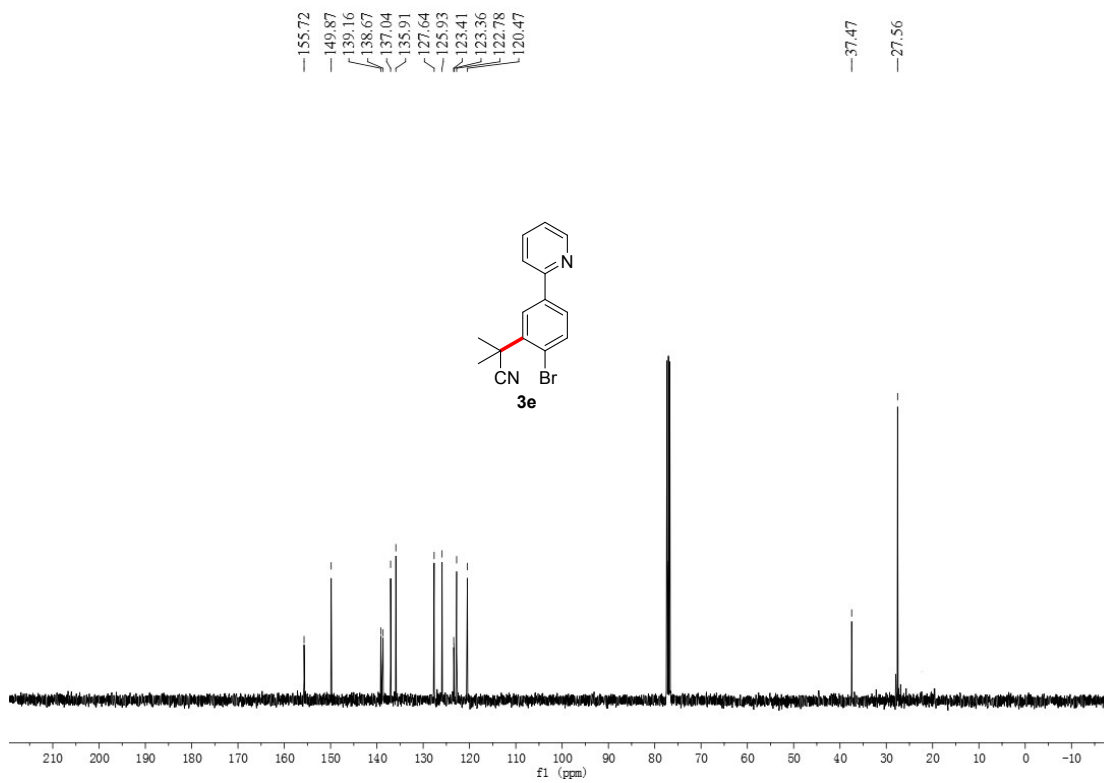

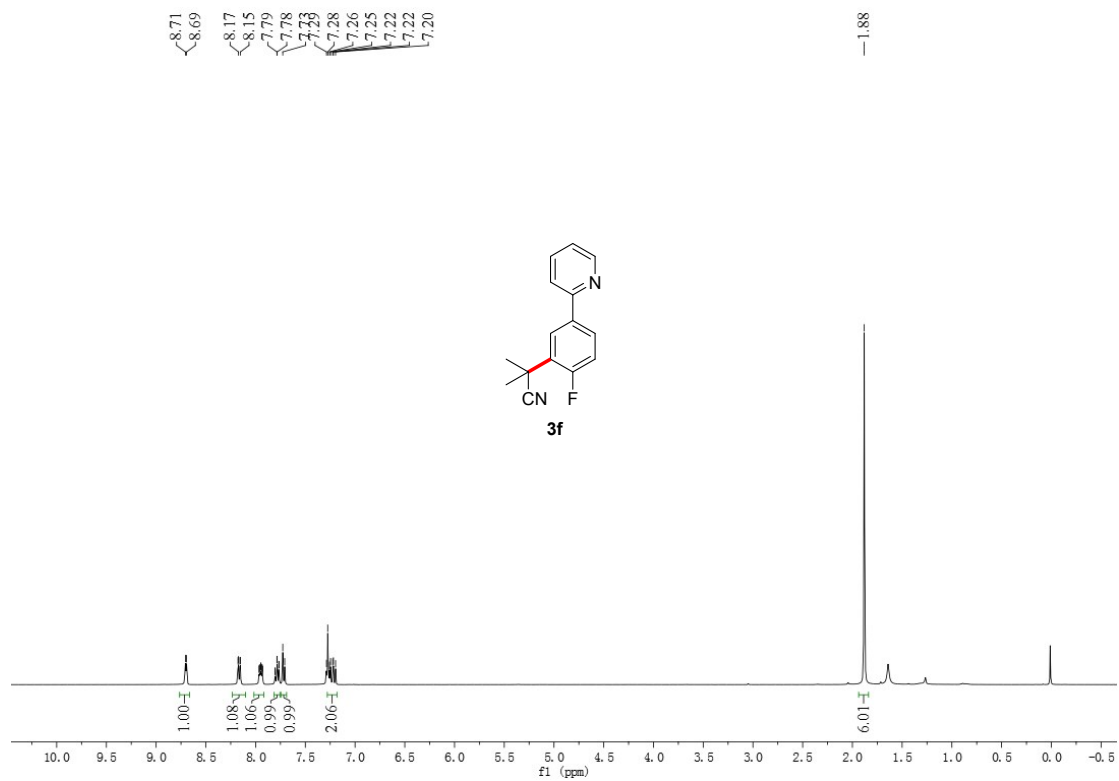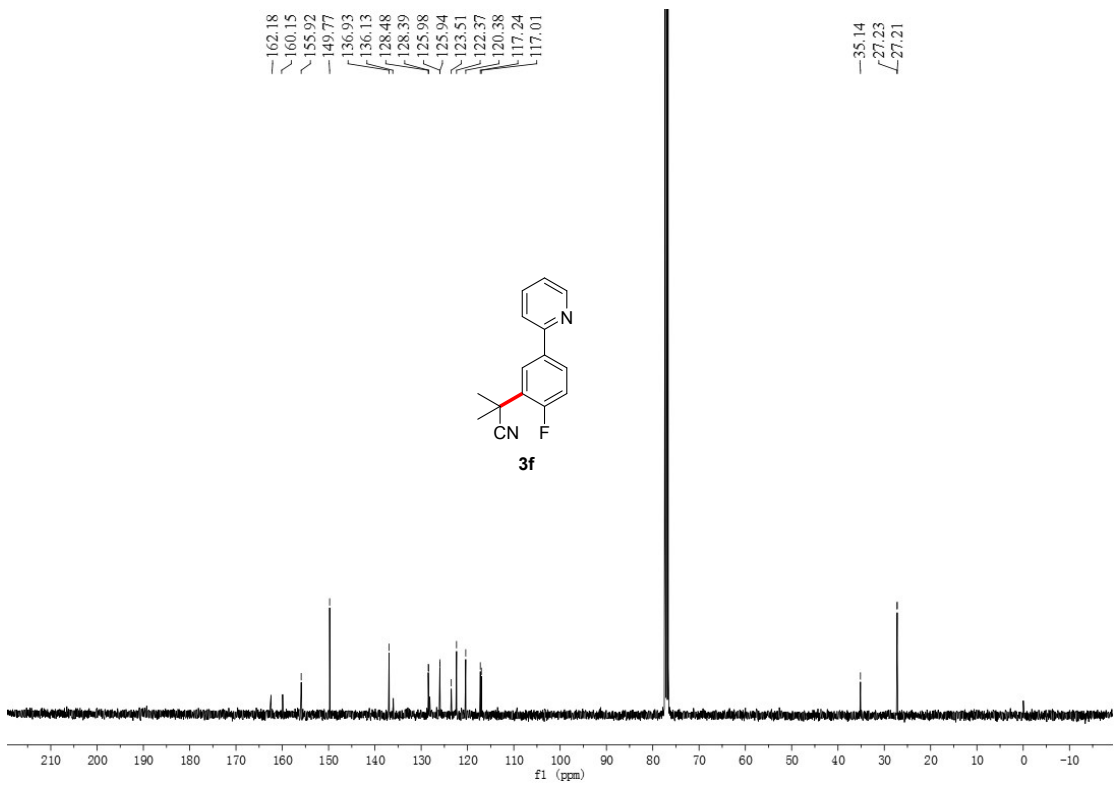

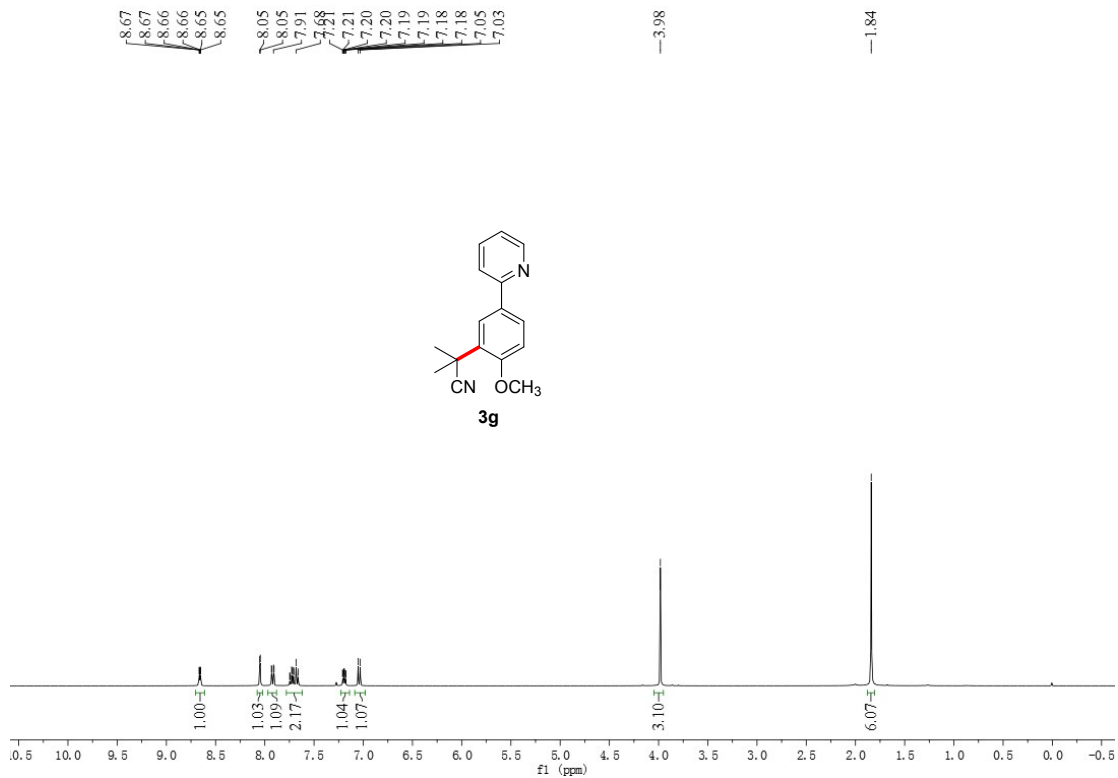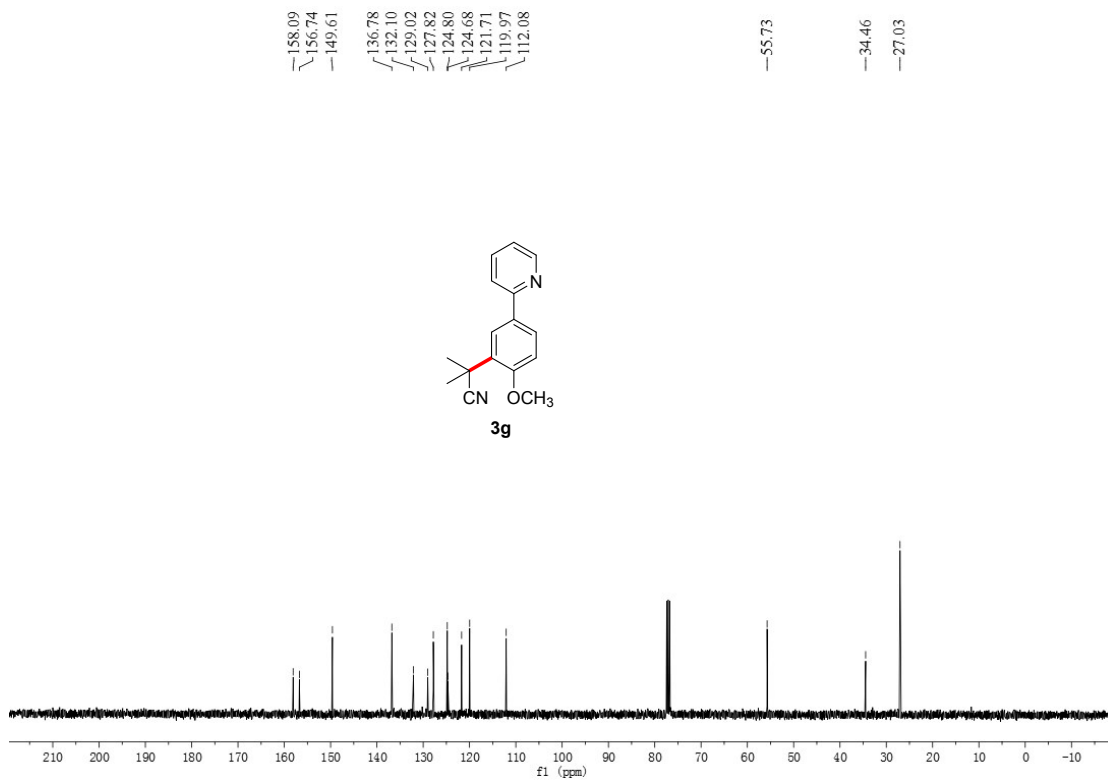

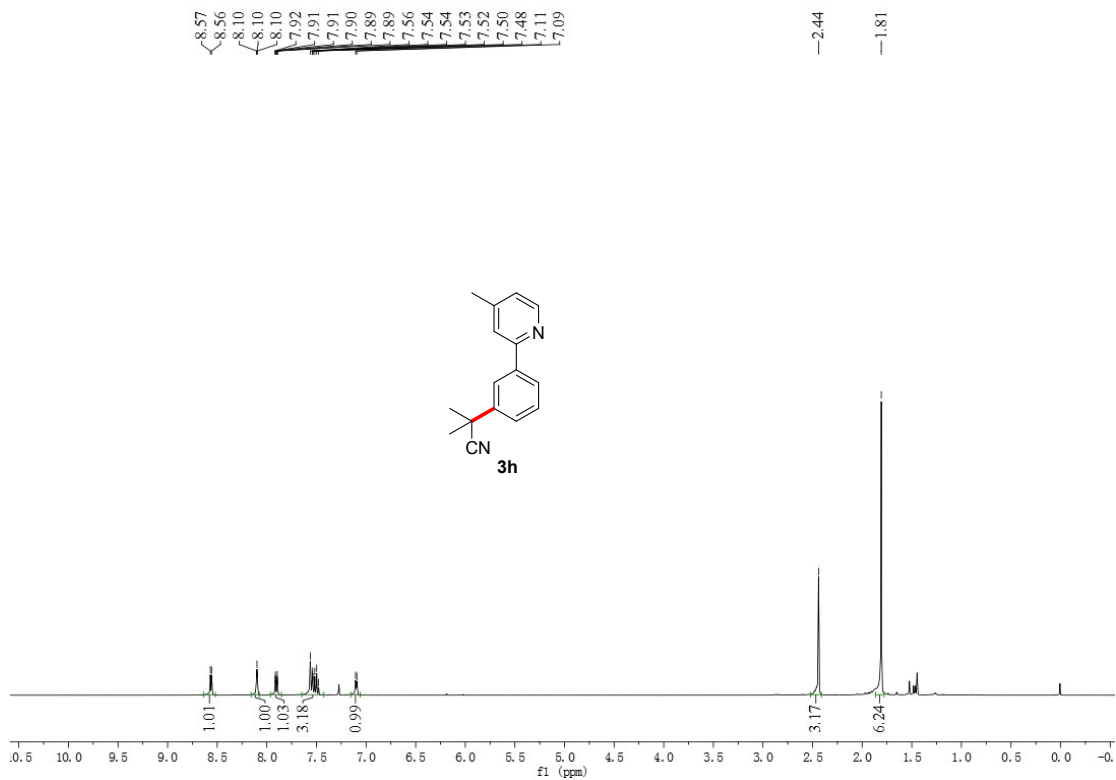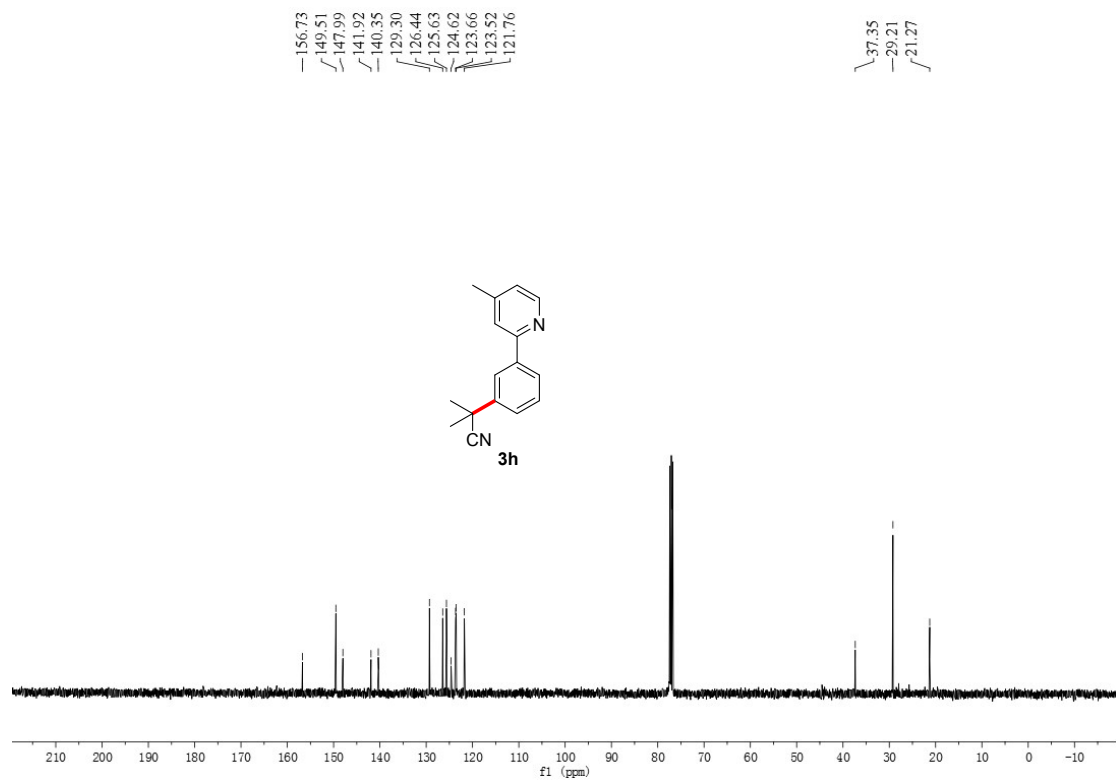

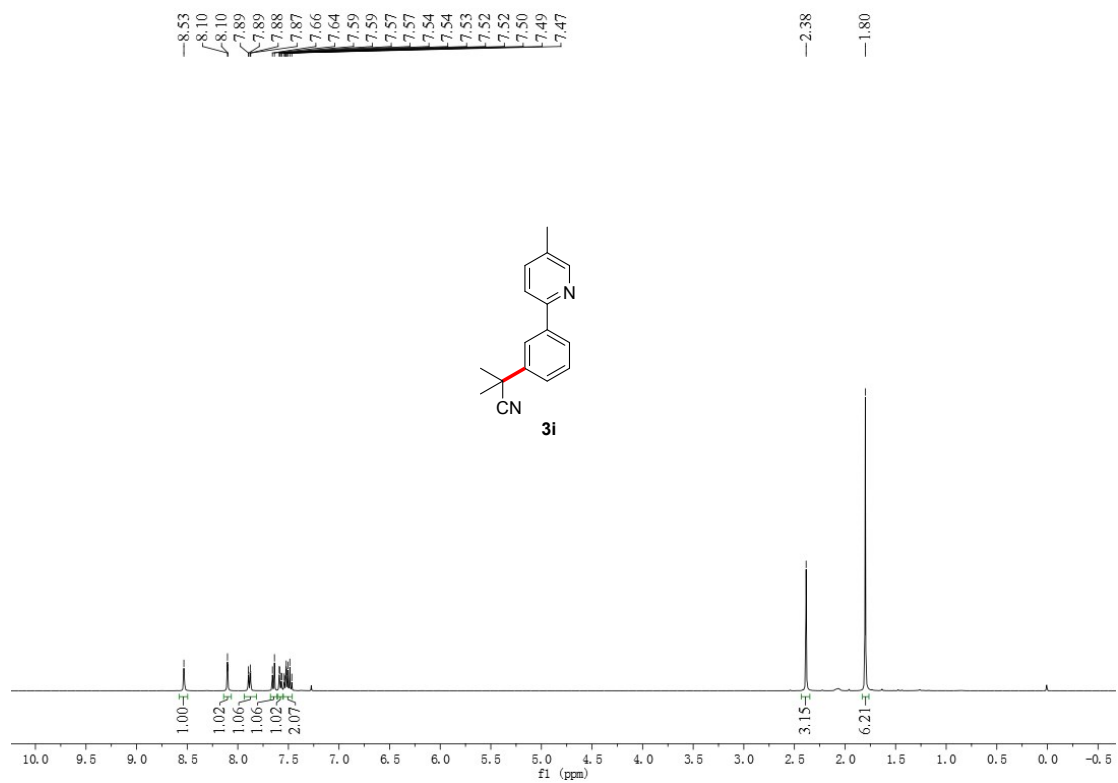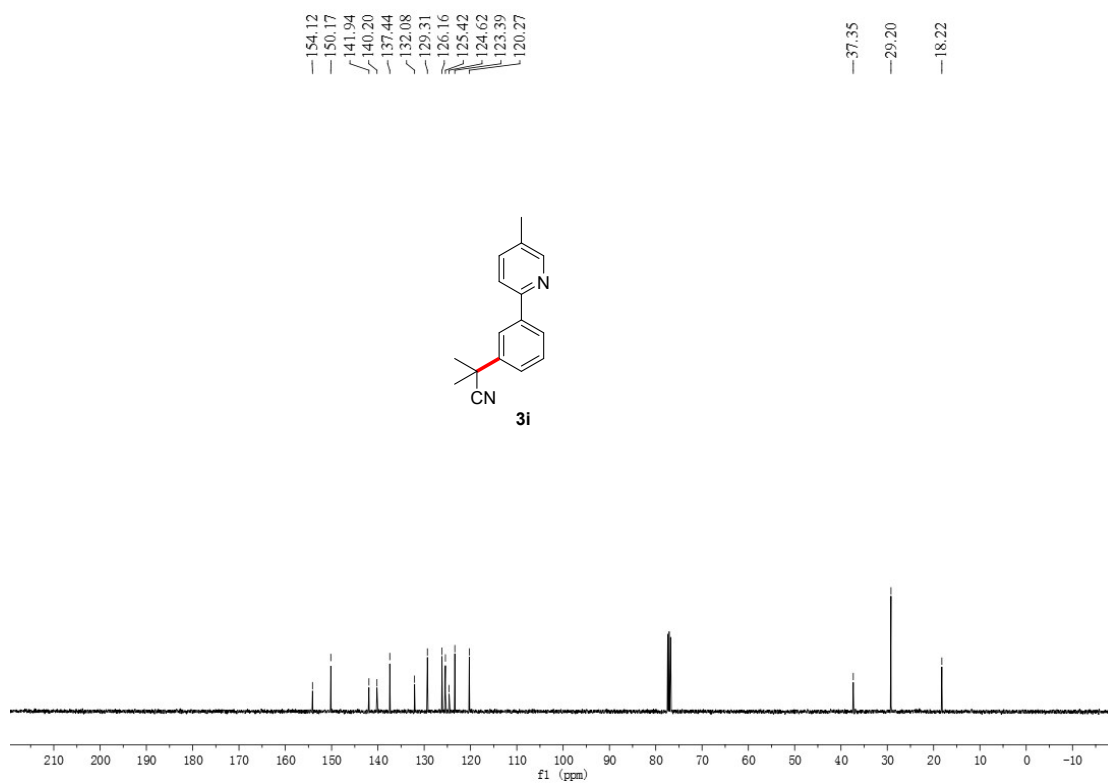



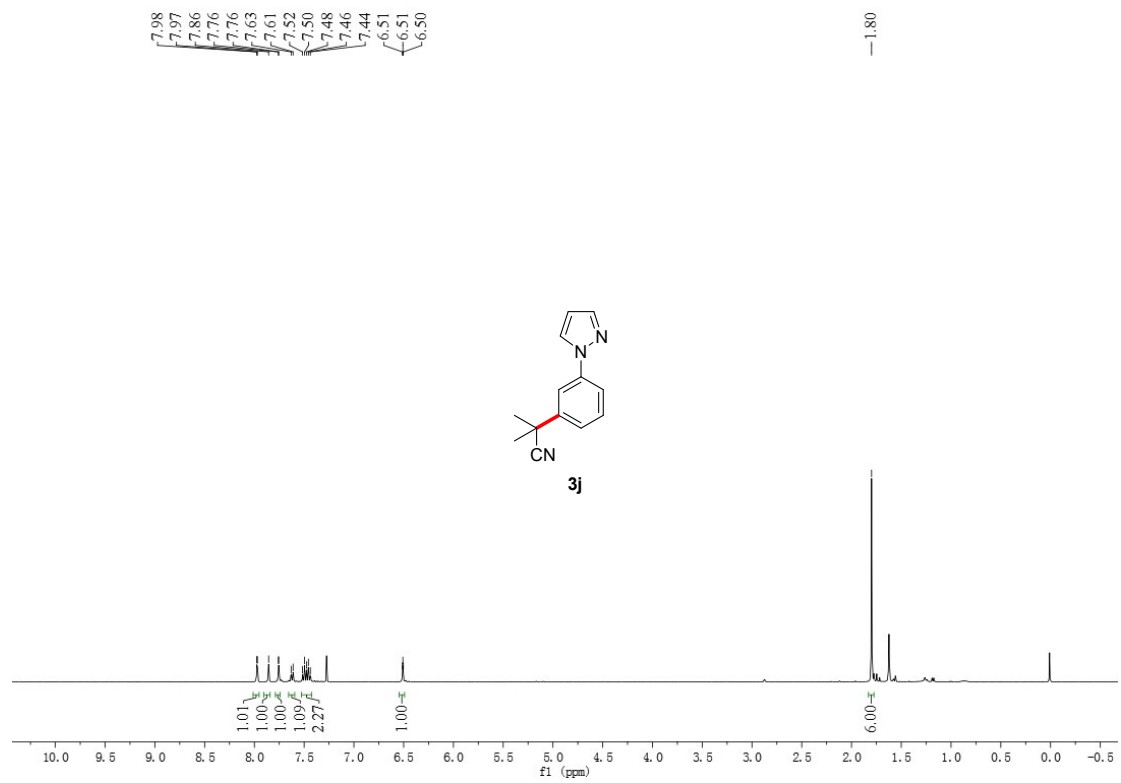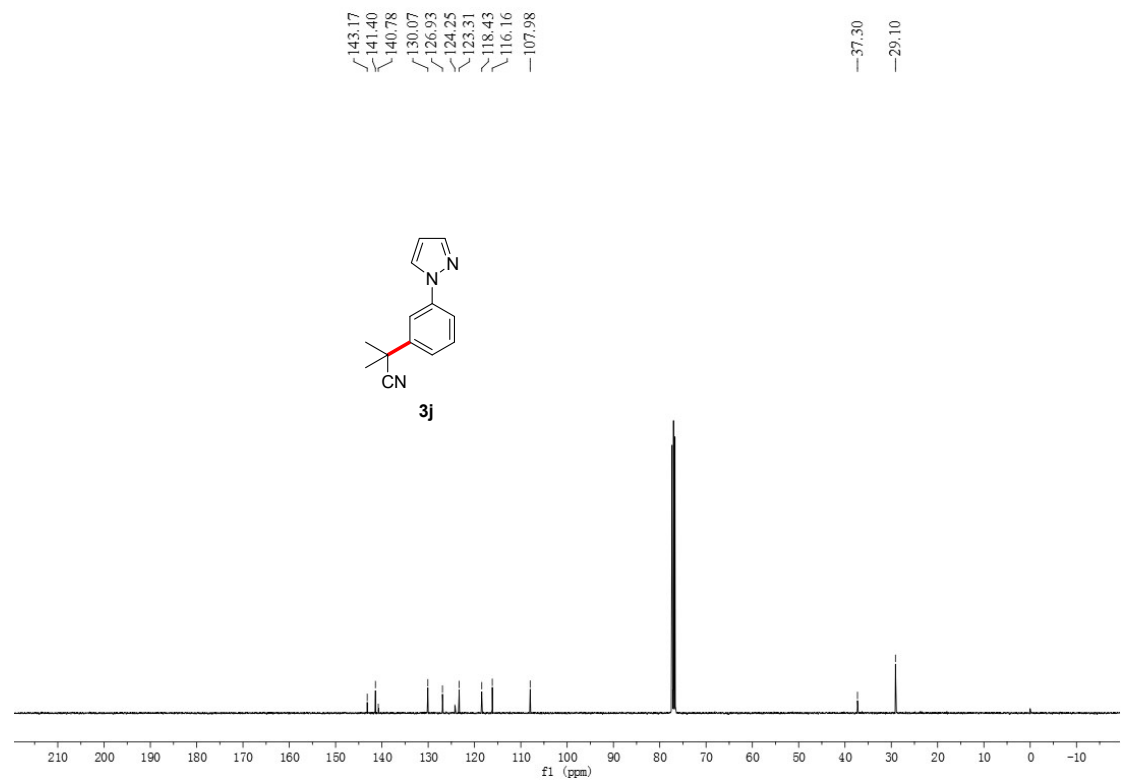

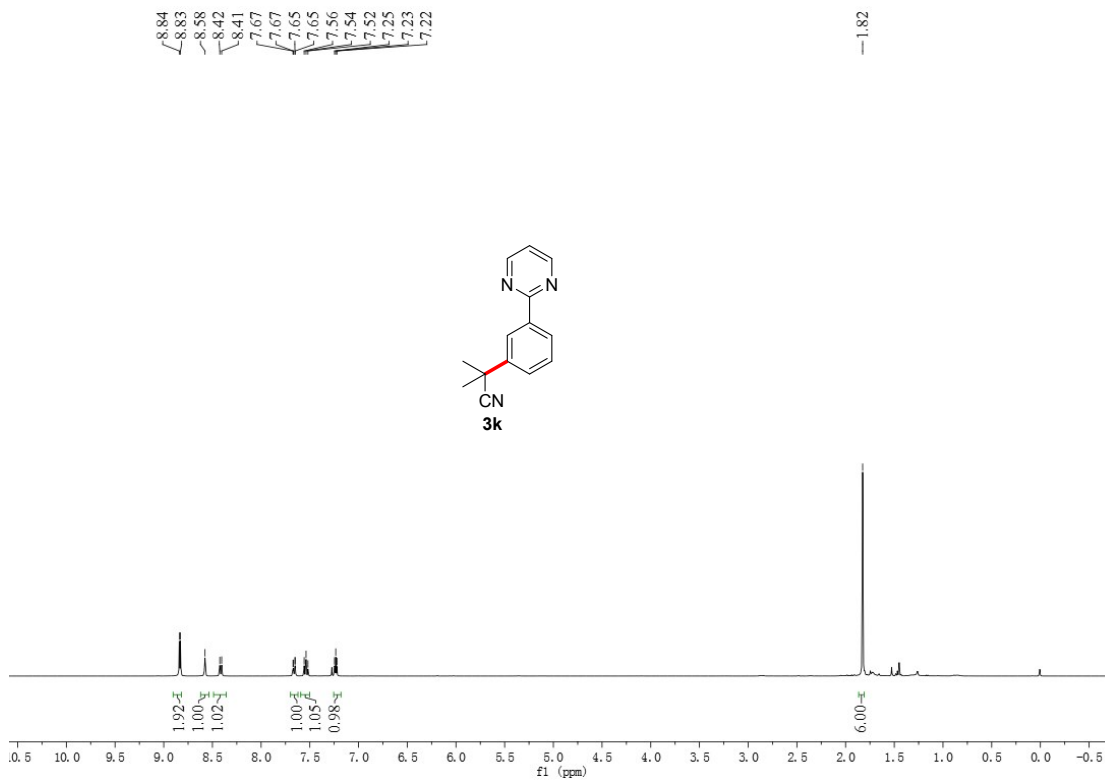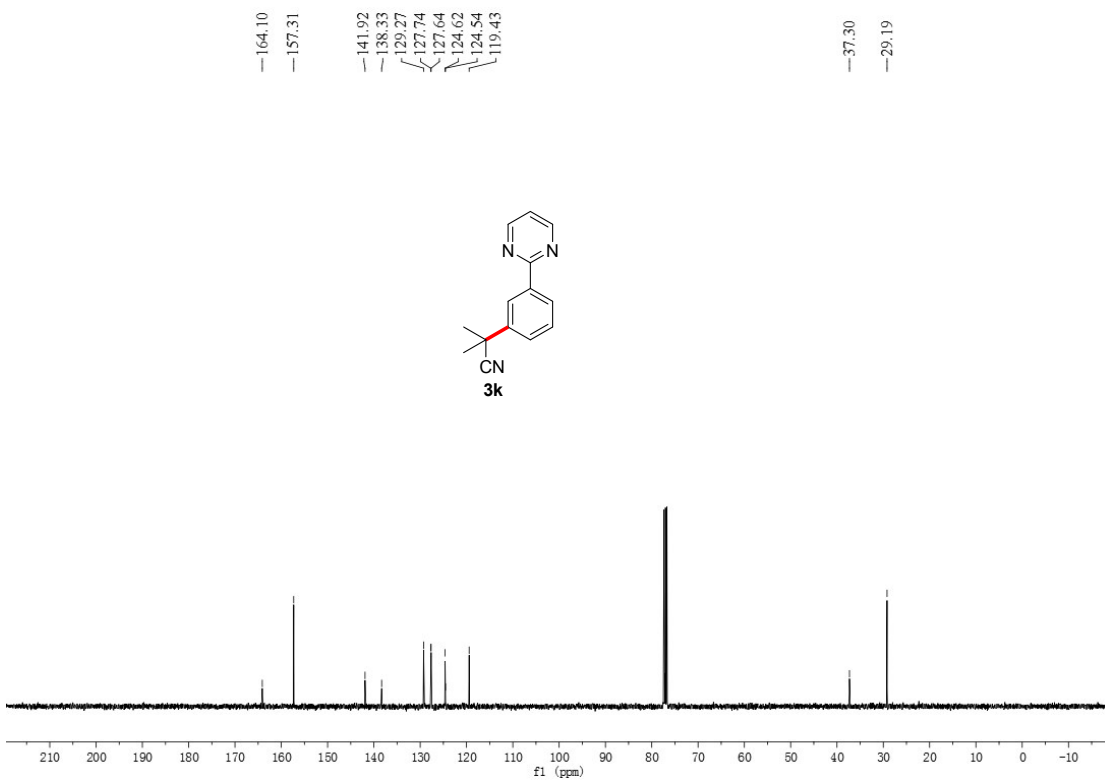

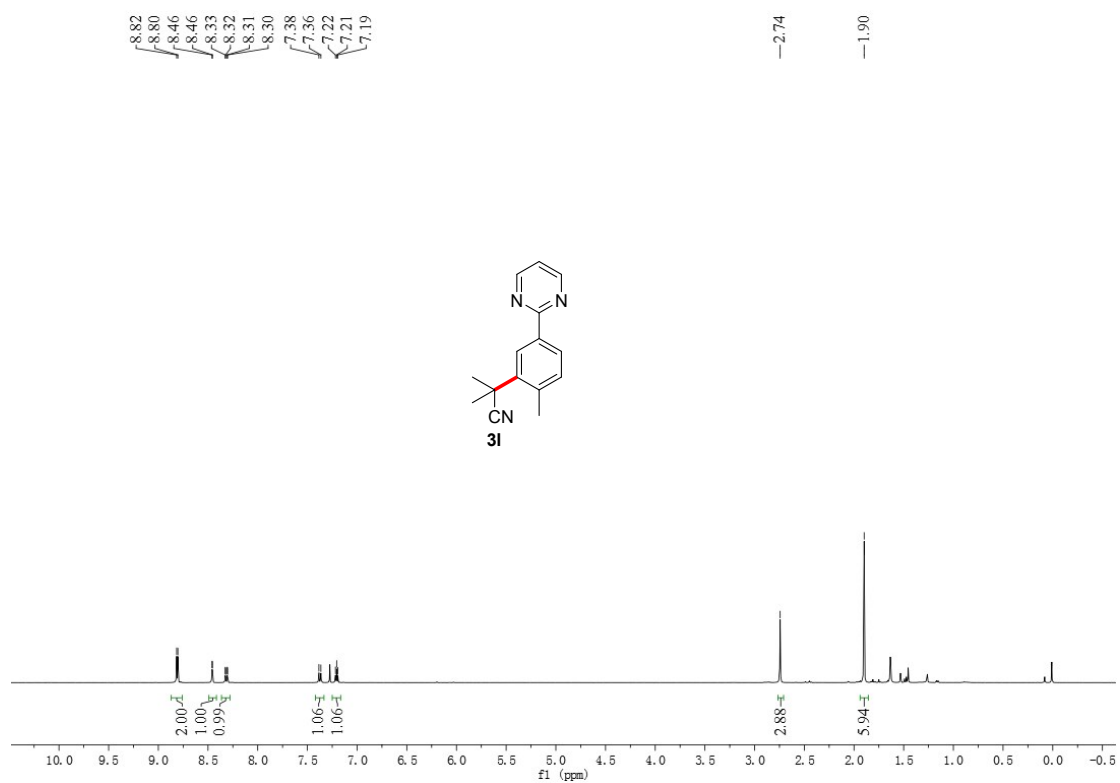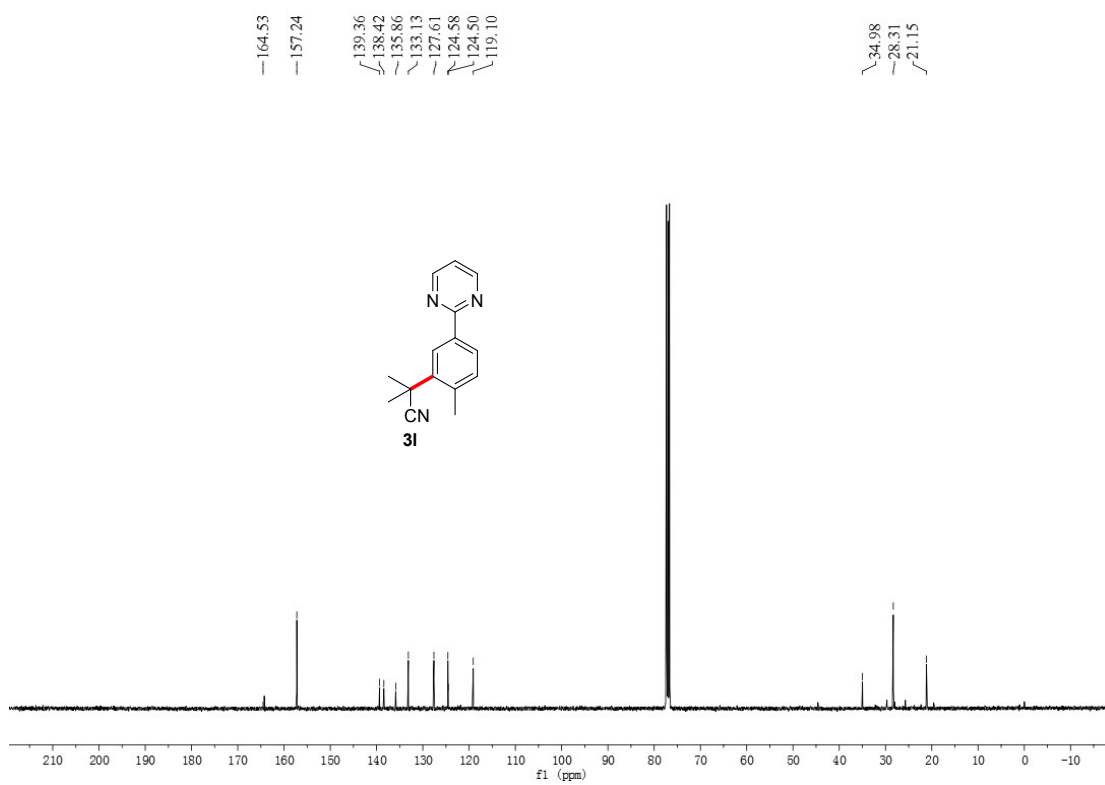

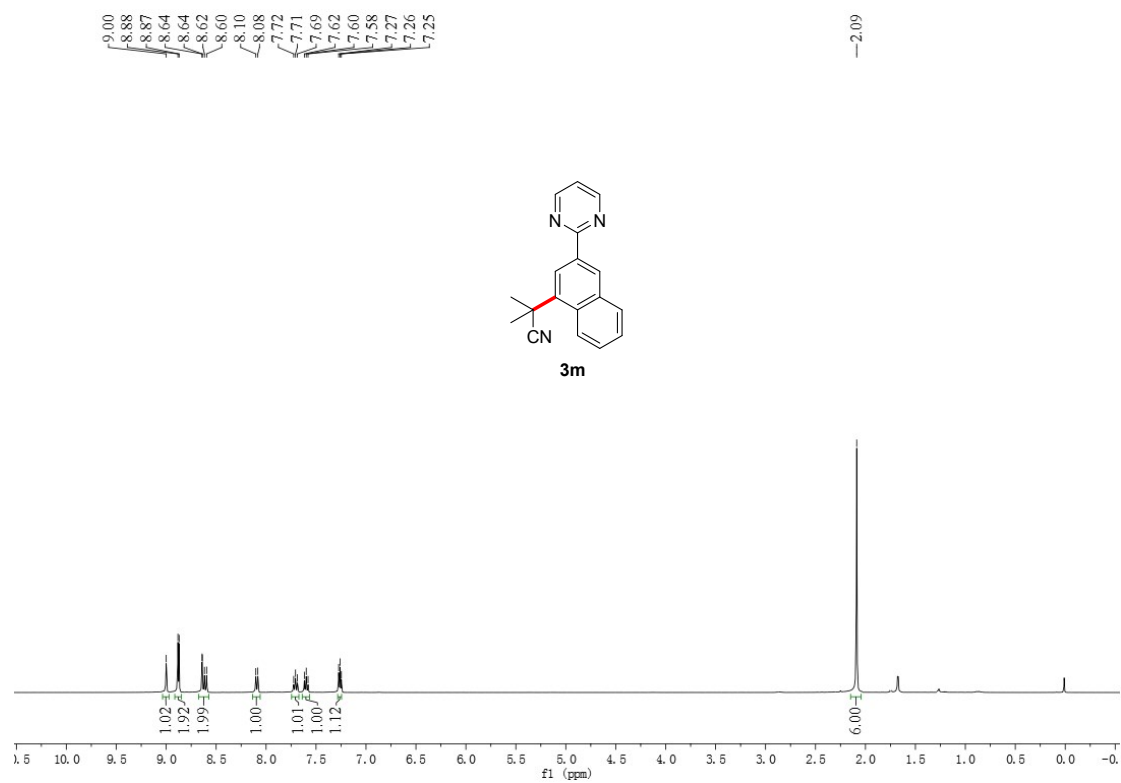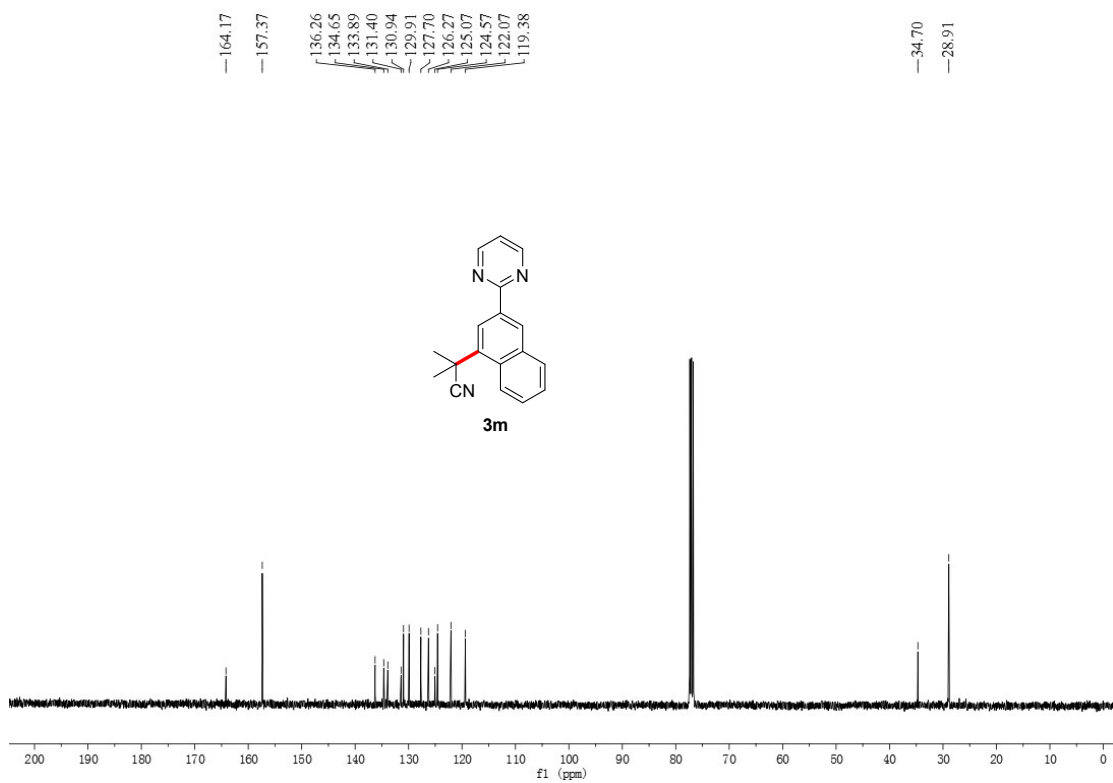

8.77  
8.76  
8.60  
8.58  
8.41  
8.29  
8.29  
8.04  
8.02  
7.90  
7.89  
7.84  
7.84  
7.82  
7.80  
7.69  
7.67  
7.67  
7.65  
7.60  
7.60  
7.58  
7.57  
7.31  
7.30  
7.30  
7.30  
7.28  
7.27

-2.08

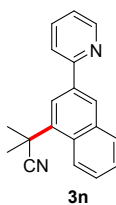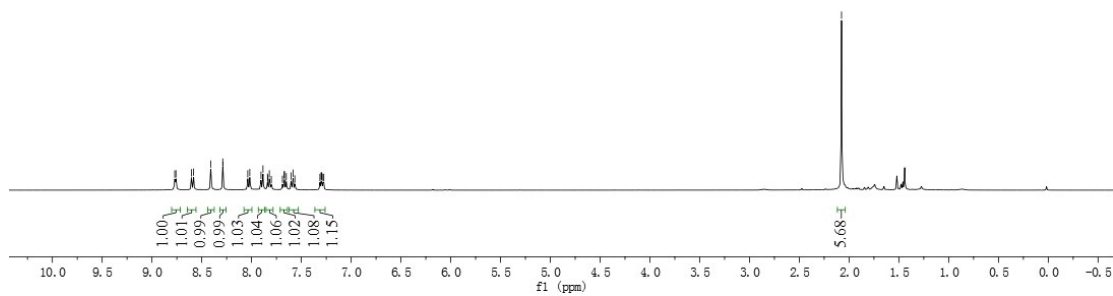

156.80  
149.82  
136.94  
136.46  
135.83  
134.80  
130.30  
127.57  
127.00  
126.25  
125.03  
124.56  
122.44  
121.94  
120.83

34.81  
28.86

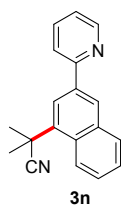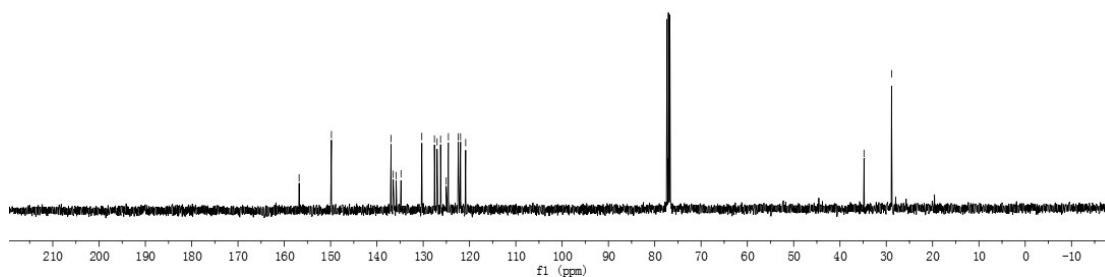

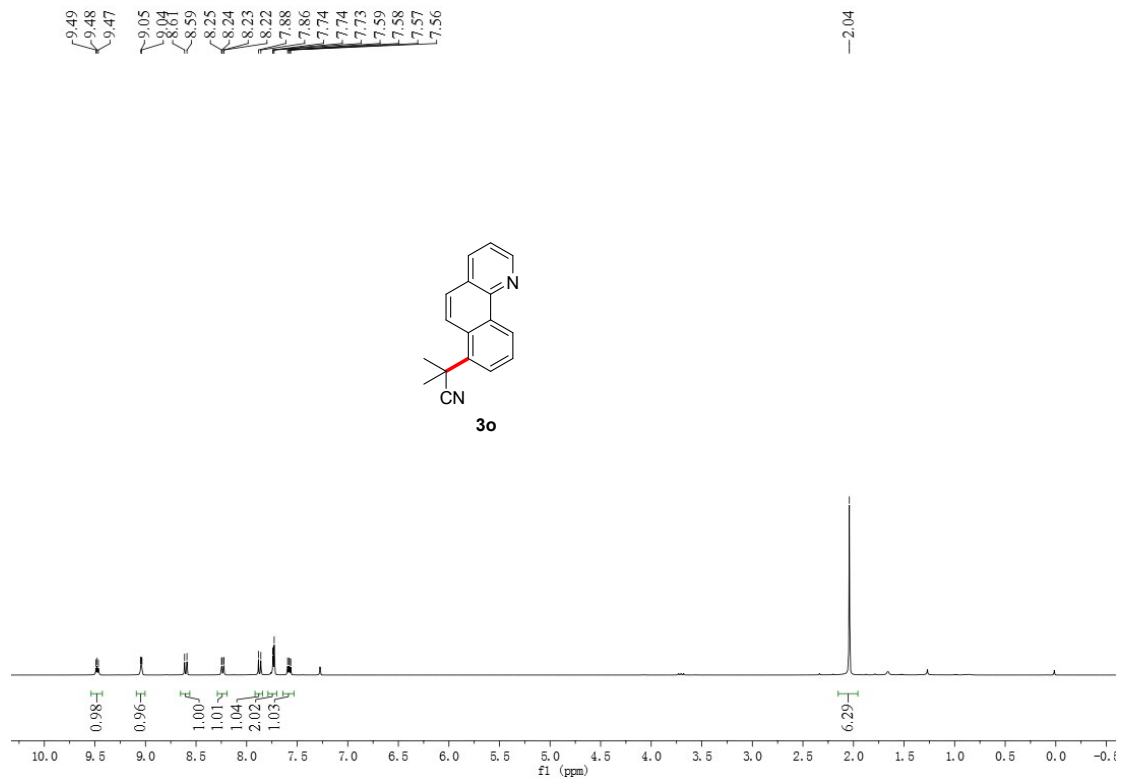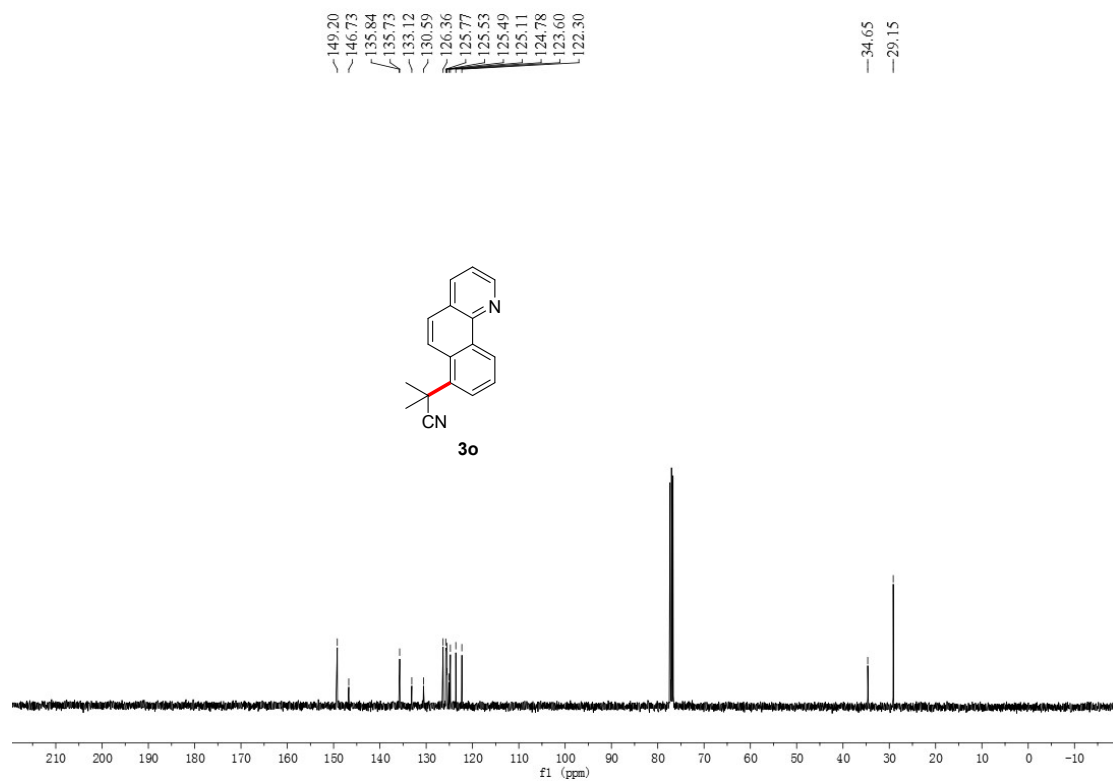

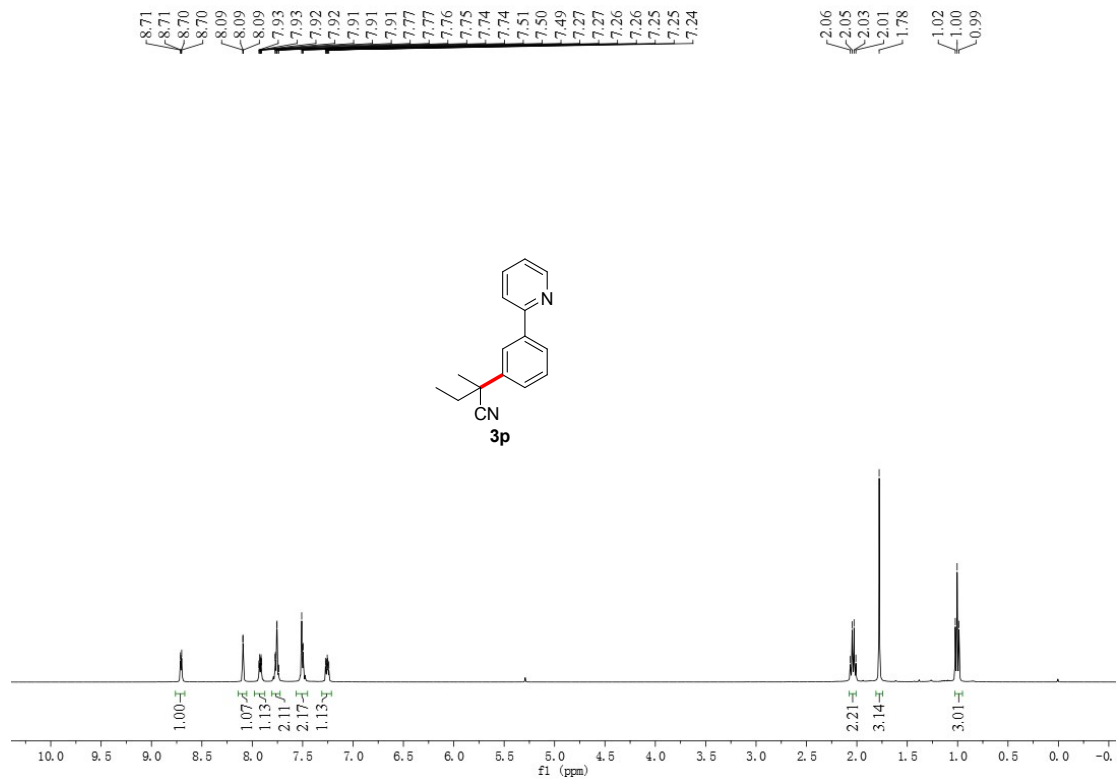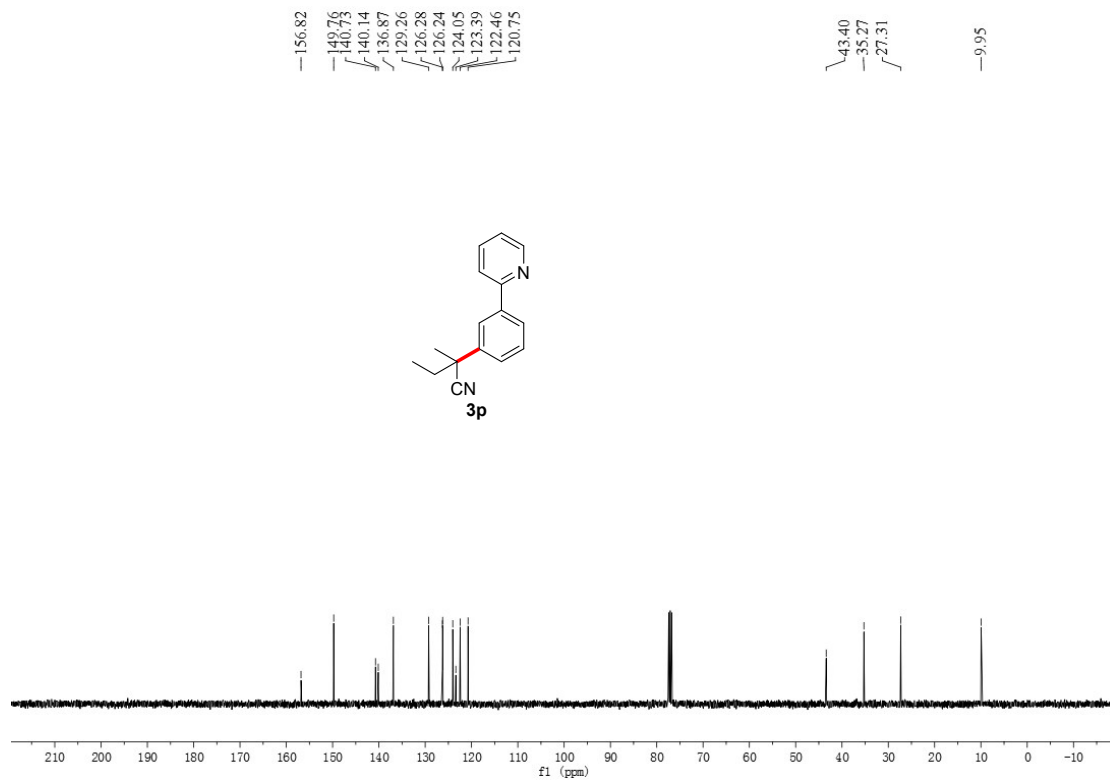

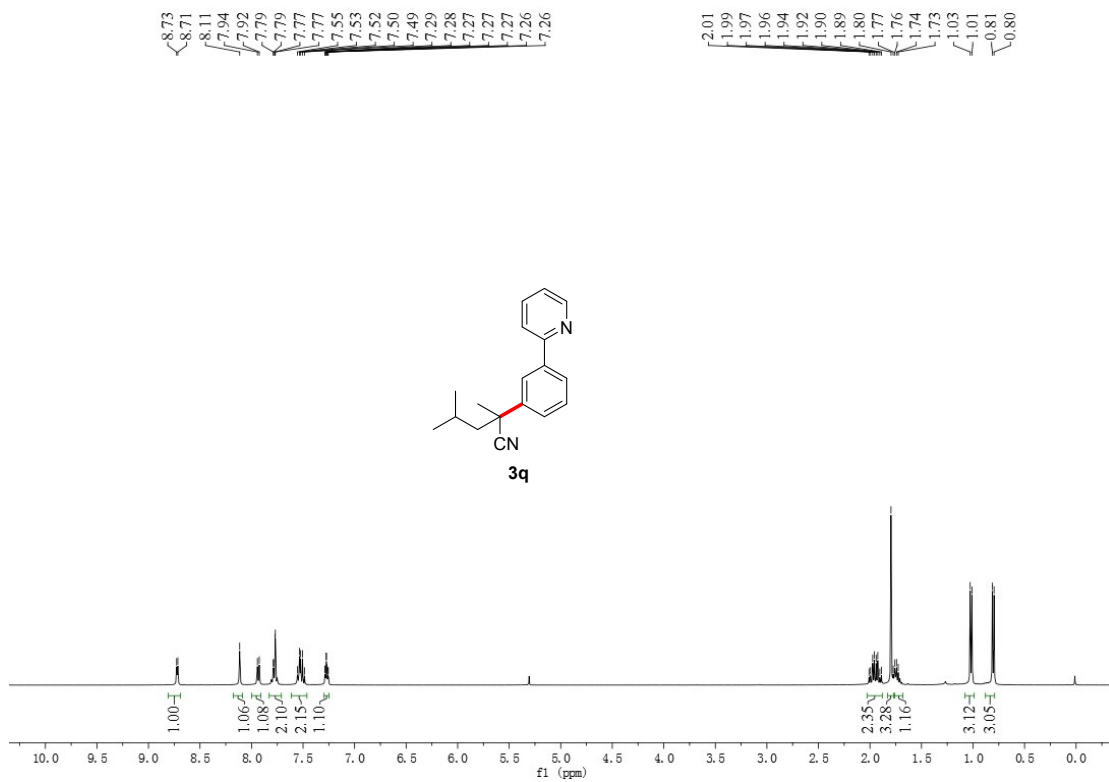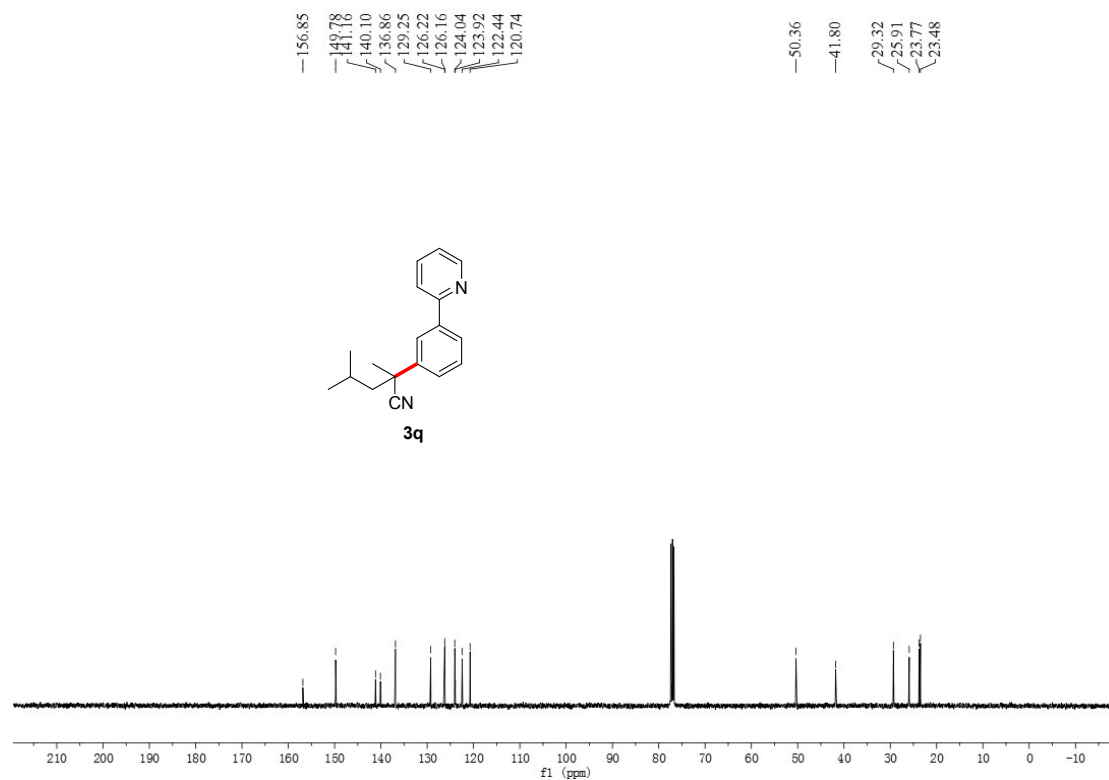



8.72  
8.70  
8.15  
7.92  
7.90  
7.78  
7.76  
7.74  
7.59  
7.57  
7.52  
7.50  
7.48  
7.28  
7.27  
7.26  
7.25  
7.25

1.91  
1.89  
1.88  
1.86  
1.33  
1.31

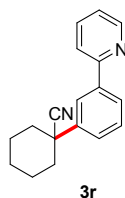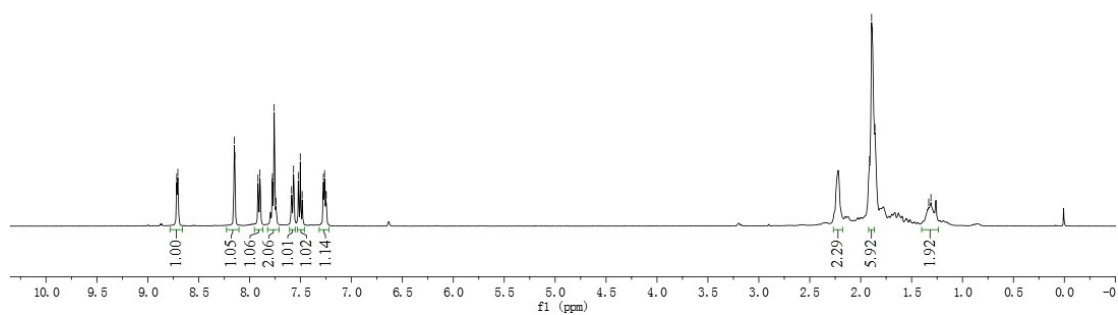

156.91  
149.74  
142.07  
140.10  
136.88  
129.30  
126.37  
126.33  
124.15  
122.73  
122.43  
120.77

44.52  
37.36  
24.96  
23.62

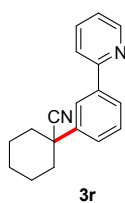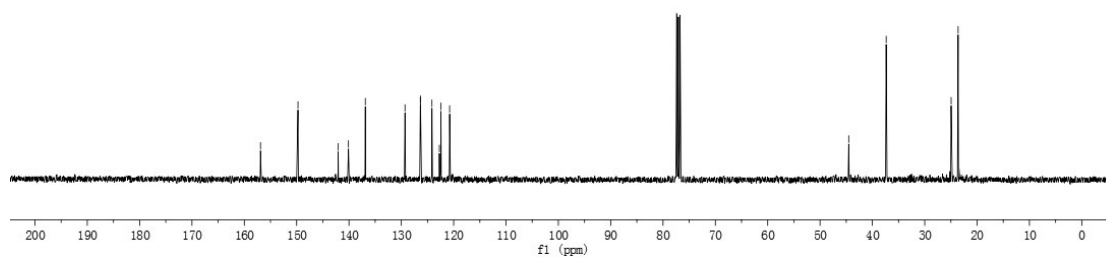

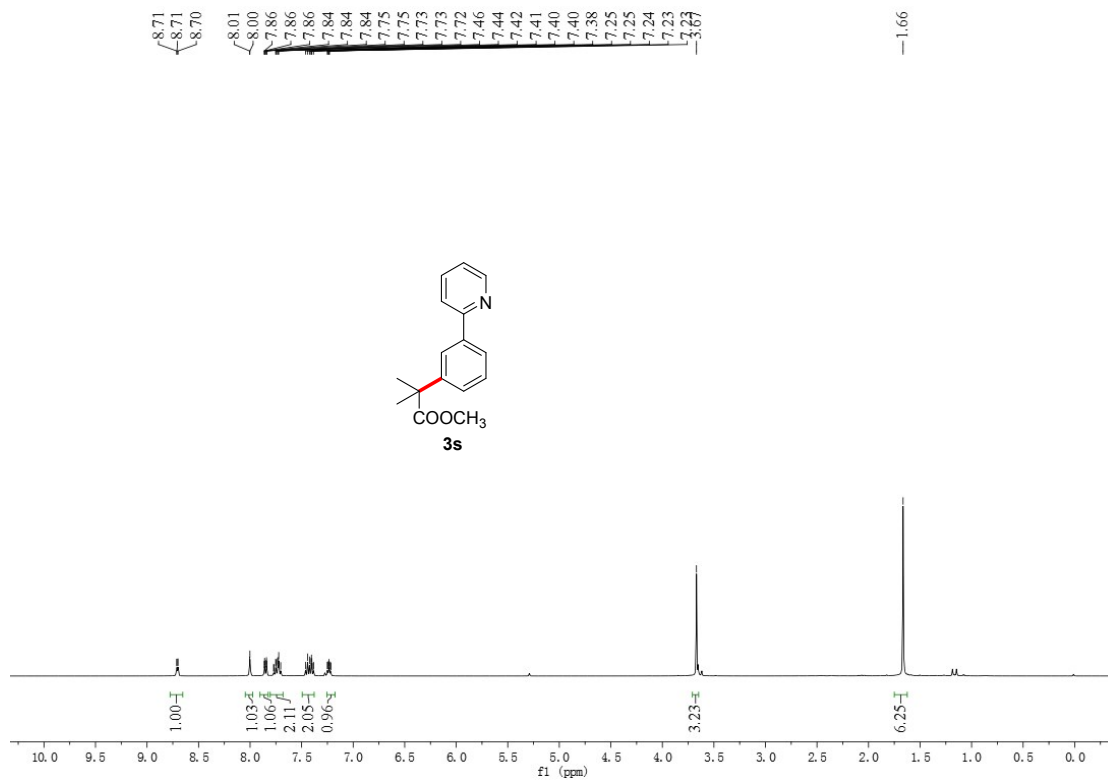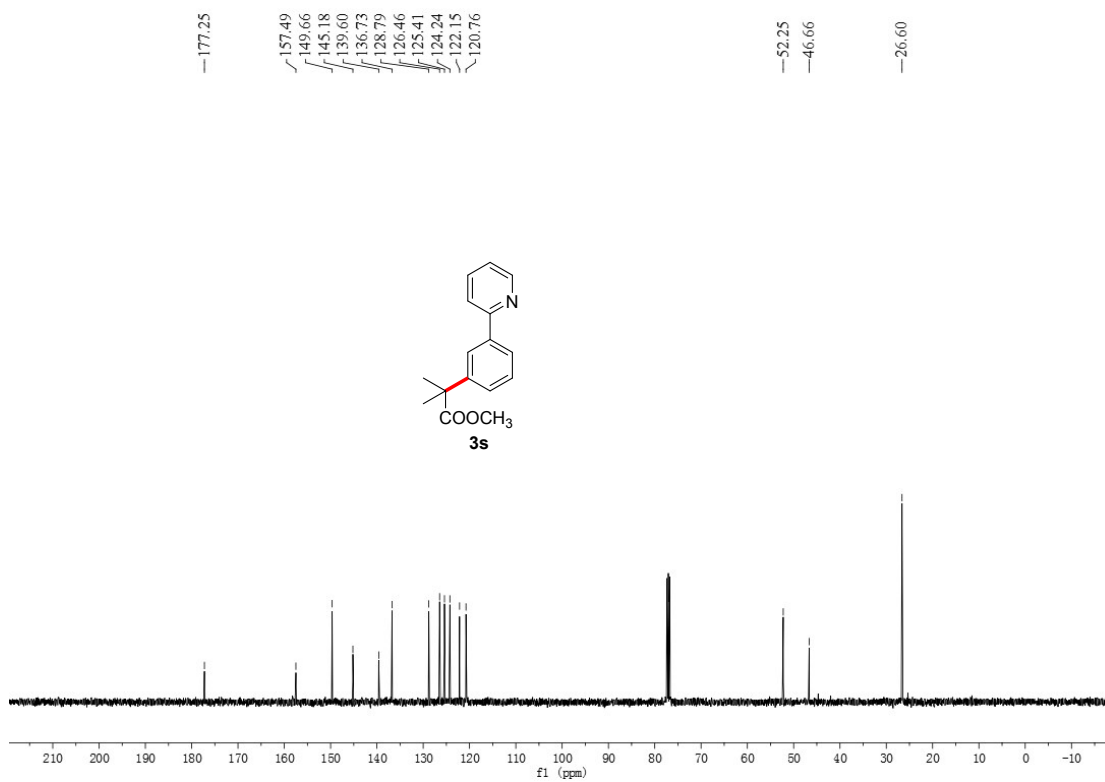

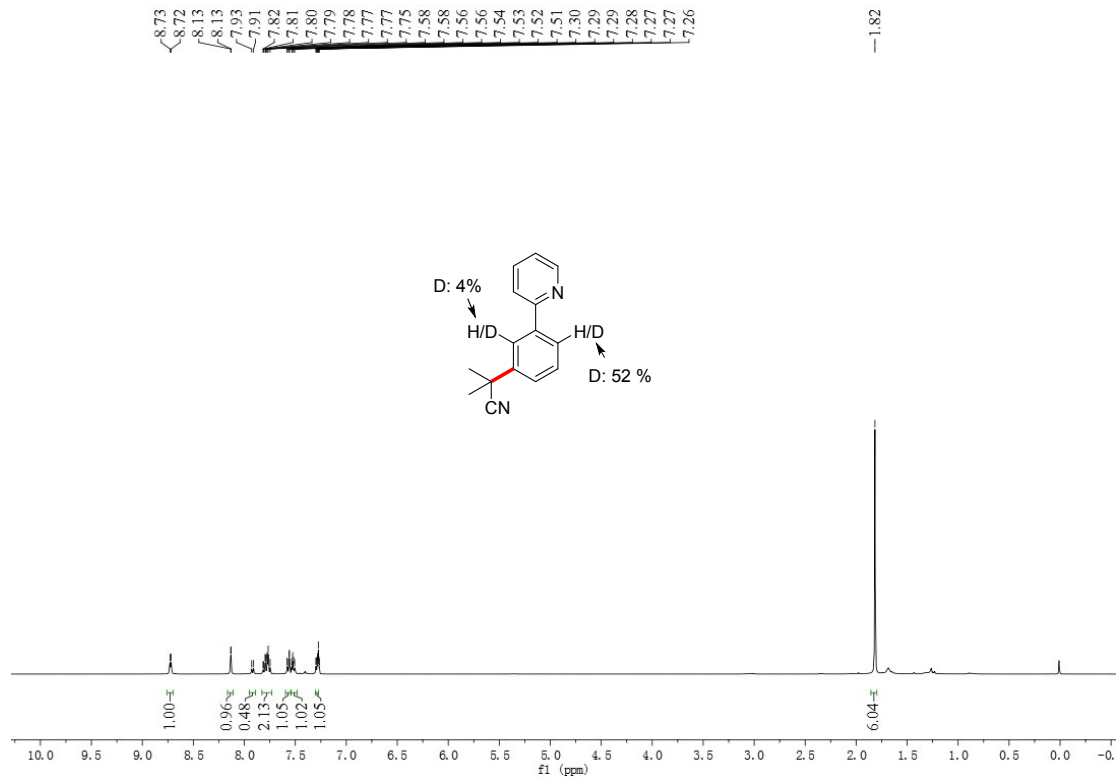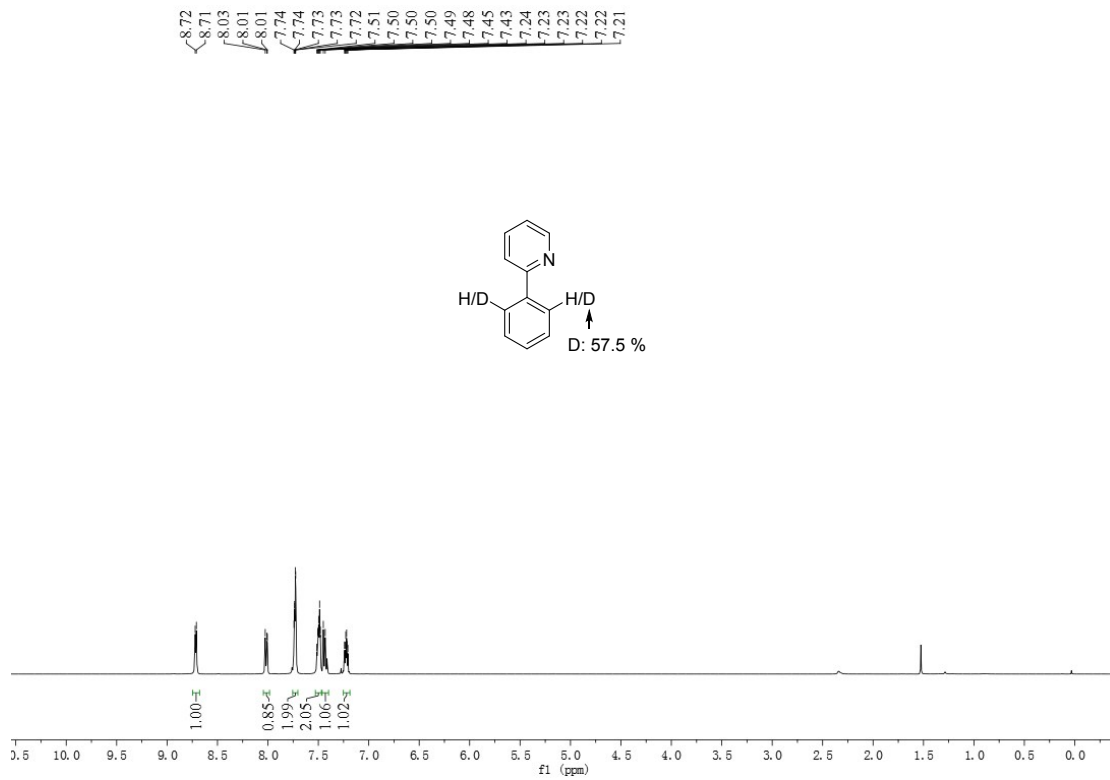

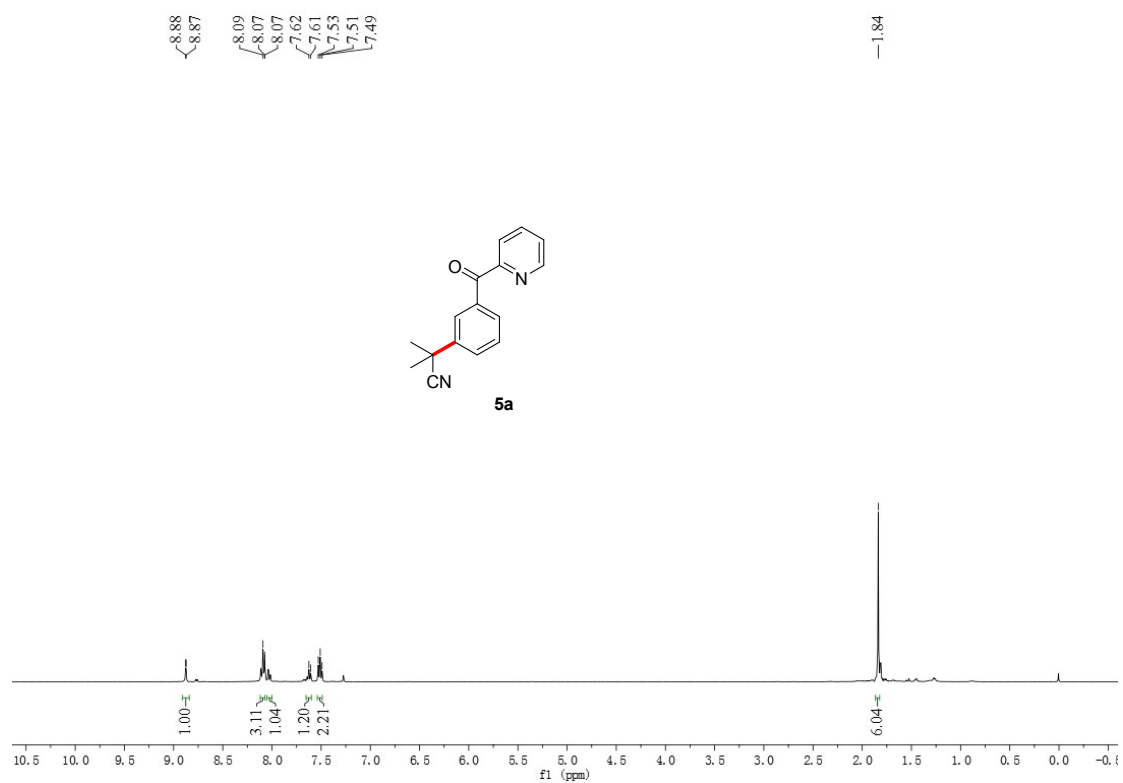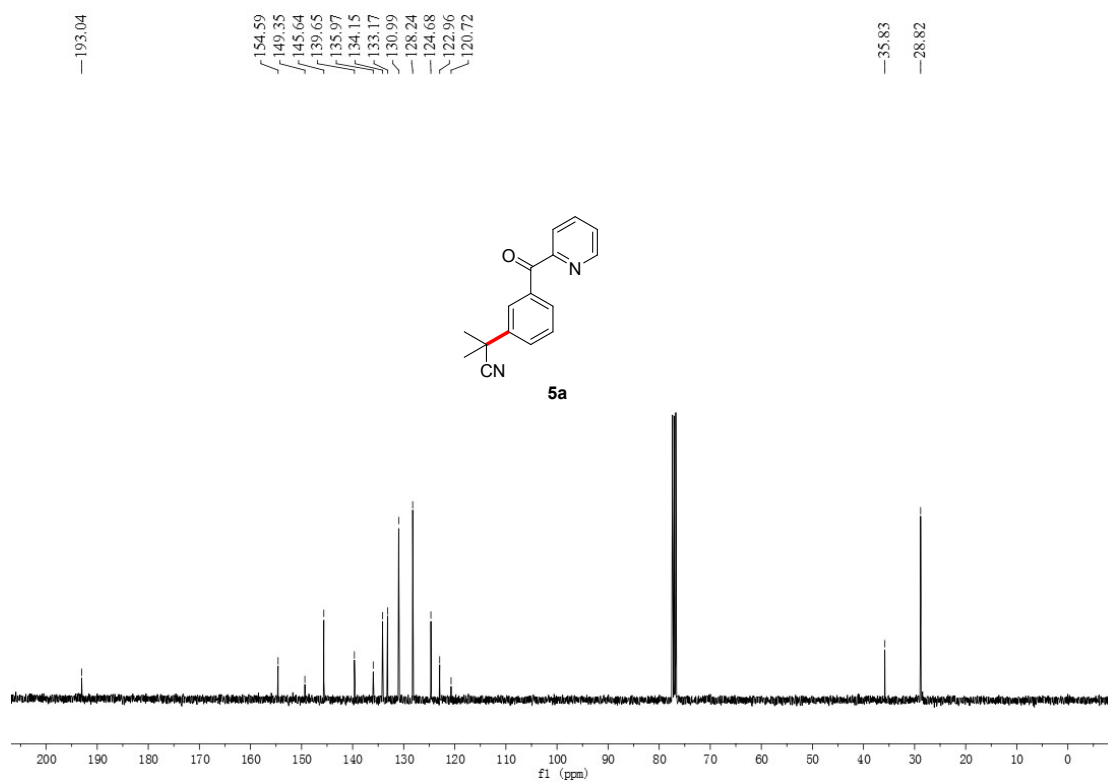

Supplement: d0qo00703j1.pdf [file d0qo00703j1.pdf]
